# Supplementary material for: Experience, circuit dynamics, and forebrain recruitment in larval zebrafish prey capture
Source: eLife. 2020 Sep 28;9:e56619. doi: 10.7554/eLife.56619 (PMC7561350; doi:10.7554/eLife.56619)
Supplement: Figure 1—figure supplement 1—source data 1. [file elife-56619-fig1-figsupp1-data1.csv]

Figure1, figure supplement 1
Figure 1, figure supplement 1 A									Figure 1, figure supplement 1B
left			middle			right			left			middle			right
fish length			spont swiming velocity			hunt swim velocity			prob. spont. tail flick			prob. spont. eye saccadw			prob. spont. eye convergence
experienced	naive		experienced	naive		experienced	naive		experienced	naive		experienced	naive		experienced	naive
4.68	4.75		2.49	3.29		2.53	2.16		0.2	0.1		0.175	0.1		0.025	0
4.54	4.58		3.43	2.64		2.79	1.73		0.1	0.15		0.1	0.2		0.05	0.05
4.71	4.6		3.43	3.05		3.09	1.26		0.25	0.1		0.2	0.1		0.05	0
4.53	4.31		3.63	3.38		3.14	2.6		0.1	0.2		0.1	0.25		0	0.05
4.62	4.57		3.24	3.8		2.43	3		0.1	0.05		0.25	0.175		0.1	0
3.88	4.56		3.85	3.74		2.87	3.05		0.1	0.05		0.15	0.3		0	0
4.53	4.69		3.15	1.89		2.56	1.45		0.1	0.1		0.15	0.35		0.05	0.05
4.61	4.63		2.51	3.71		2.74	2.47		0.05	0.05		0.2	0.15		0	0
4.28	4.42		2.44	3.51		2.93	2.63		0.05	0.35		0.15	0.2		0	0
4.75	4.7		1.94	2.08		2.52	1.64		0.15	0.1		0.1	0.25		0	0.05
4.77	4.55		2.91	2.95		3.52	2.39		0.15	0.2		0.3	0.35		0	0.05
4.5	4.63		2.33	0.74		2.74	2.17		0.15	0.15		0.3	0.15		0.1	0
4.52	4.44		1.65	3.01		2.55	2.39		0.05	0.21875		0.05	0.03125		0	0
4.53	4.23		3.18	2.6		3.45	2.66		0	0.2		0.25	0.2		0	0
4.53	4.5		2.63	2		2.82	2.04		0.05	0		0.15	0.3		0	0
4.53	4.35		1.28	4.16		2.45	2.57		0.05	0.25		0	0.15		0	0.05
4.62	4.53		2.26	2.78		2.81	2.78		0.25	0.05		0.2	0.05		0	0
4.35	4.66		1.5	1.87		2.6	2.99		0.05	0.2		0.05	0.2		0	0
4.26	4.26		2.78	1.95		3.03	3.75		0.1	0.05		0.35	0.25		0	0
4.21	4.35		1.95	2.24		3.55	2.62		0.25	0.25		0.15	0.1		0.05	0.1
4.48	4.62		2.38	2.07		3.63	2.44		0.15	0.05		0.15	0.05		0.05	0
4.84	4.23		2.01	2.67		2.67	2.5		0.1	0.1		0.1	0.25		0.05	0.1
4.05	4.45		2.18	4.08		2.61	3.15		0.3	0		0.1	0		0	0
4.01	4.41		2.39	1.46		2.85	2.1			0.15			0.2			0
4.23	4.36		2.66	2.58		3.22	2.91			0.45			0.45			0
4.36	4.36		2.15	2.97		2.56	2.44
4.28	4.54		0	3.44		2.02	3.06
4.14	4.28		0.98	1.04		3.29	2.07		Figure 1, figure supplement 1 C					Figure 1, figure supplement 1 D
4.1	4.19		2.04	1.8		2.49	2.8		# of captures per minute		time of day			# of captures per minute		# of initial paramecia
4.05	4.32		2.21	1.95		2.98	2.33		experienced	naive	experienced	naive		experienced	naive	experienced	naive
3.82	4.13		1.63	0.63		2.95	1.8		2.6	3.4	1515	1648		5.2	3	113	160
4.01	4.4		5.02	0		8.36	1.51		1.4	0.2	1550	1524		1	2.8	81	104
3.89	4.21		3.31	6.38		8.38	8.42		2	4.2	1612	1559		5.6	0.4	156	121
4.21	3.89		5.13	7.58		8.67	7.6		3.2	3	1342	1411		5.2	5.6	119	103
4.01	3.82		6.28	3.65		8.09	8.18		3.2	4.4	1401	1454		4.4	4.8	88	177
4.05	3.54		3.8	9.52		7.54	9.15		3	1.6	1434	1323		6.2	3.2	120	104
3.85			4.35	3.28		5.89	5.85		4	0.2	1114	1039		4	3.4	128	134
3.85			3.4	3.64		3.2	4.5		4.6	2.6	1140	1119		4.2	5	110	104
			7.23	3.12		4.96	5.31		2.8	2.6	1216	1132		3.6	5	109	125
			7.6	3.82		5.06	4.1		5.4	2.6	1243	1351		5.4	1.2	103	137
			6.75	2.35		3.38	6.63		3.2	1.8	1515	1149		7.6	4	144	123
			6.04	5.18		3.98	4.54		1.8	0	1602	1149		6	5.2	132	146
			6.57	7.73		3.86	3.12		4.4	5.4	1346	1225		2.6	3.4	84.54	109.28
			3.4	6.47		4.39	3.3		7	5.4	1448	1456		1.4	0.2	147.18	135.7
			5.82	4.52		3.68	3.51		6.2	2.6	1422	1553		2	4.2	148.57	129.86
			3.61	4.24		3.25	4.36		2.8	5.8	1630	1354		3.2	3	75.99	68.28
			1.12	5.99		5.08	4.68		3.8	2.4	1431	1431		3.2	4.4	79.59	108.38
			3.49	7.16		3.88	3.39		3.6	2	1316	1728		3	1.6	87.35	82.7
			2.94	11.78		3.65	5.7		5.8	6.4	1707	1325		2.8	0.2	88	127.41
			1.08	2.58		2.7	2.58		5.2	2.6	1356	1050		3.8	2.6	46	76.96
			0.99	3.23		3.88	2.39		3.2	1.8	1756	1805		3.6	2.6	36	83.02
									3	4.8	1059	1405		5.8	2.6	68	95.8
									2.8	2	957	1023		5.2	1.8	39	197.51
Figure 1, figure supplement 1 E									2.4	2.8	1418	1639		3.2	2	80	115
spont. swim distance									3.4	4	1705	1555		3	6.4	58	39
2h				6h					4.2	1.6	1631	1545		2.8	2.6	96	31
paramecia	flakes	shrimp		paramecia	flakes	shrimp			3.2	1.4	1536	1316		8.4	1.8	90	60
0.1	0.07	0.06		0.64	0.48	0.87			1.4	1.6	1057	1429		6.8	4.8	60	26
0.81	0.42	0.6		0.42	1.58	0.53			4	2.4	1343	1352		3.4	2	80	131
0.26	0.66	0.77		0.61	1.11	0.49			3	1.4	1605	1714		4.6	2.8	105	64
0.39	0.39	0.47		0.35	0.24	0.57			1.2	0	1307	1457		5.6	4	68	45
0.18	0.07	1.07		1.03	0.39	0.21			8.4	0	1212	1640		8	3.8	81	69
0.07	0.47	0.54		0.49	0.23	1.12			6.8	3.8	1236	1223		2.6	4.2	76	50
0.66	0.42	0.05		0.57	1.23	0.61			3.4	4.2	1259	1247		5.4	6.8	100	65
0.55	0.12	0.08		0.2	0.24	0.4			4.6	6.8	1438	1426		4.6	5.2	85	92
0.31	2.04	0.16		0.23	0.51	0.16			5.6	5.2	1501	1449		3	4	100	87
0.36	0.31	0.63		0.16	0.93	0.21			8	4	1525	1512		2.8	2.8	76	120
0.61	0.36	0.56		0.89	0.2	0.4			2.6	2.8	1206	1215		2.4	3.2	91	80
1.47	0.03	0.8		0.03	1.16	0.25			5.4	3.2	1301	1339		4.8	3.8	76	80
0.32	0.14	0.16		1.59	1.73	0.84			4.6	3.8	1359	1406		5.4	2.6	94	95
0.5	0.86	0.47		0.55	0.65	0.17			3	2.6	1425	1431		7.2	4.4	75	100
0.38	0.15	0.9		0.04	0.28	0.15			2.8	4.4	1450	1519		1.8	5.4	68	100
1.76	0.51	0.22		0.64	0.74	1.25			2.4	5.4	1559	1459		6.8	2.8	79	61
0.36	0.08	0.44		1.18	0.47	0.34			4.8	2.8	1207	1227		3.2	3	84	80
0.46	0.3	0.31		1.12	1.38	0.81			5.4	3	1240	1612		2	0	73	80
1.39	0.31	0.66		0.94	0.6	0.43			7.2	0	1554	1201		6.8	3.6	45	68
1.35	0.52	0.12		1.07	1.43	1.27			1.8	3.6	1458	1514			1.6		60
1.54	0.57	1.19		1.4	0.55	1.15			6.8	1.6	1520	1426			0.4		50
1.49	0.85	0.51		1.89	0.1	0.39			3.2	0.4	1432	1326			3.2		91
1.3	0.49	0.43		0.59	0.41	0.1			2	3.2	1625	1445			1.2		64
1.02	1.31	0.25		1.23	1.07	0.84			6.8	1.2	1407	1547
1.62	1.95	1.15		1.02	0.07	0.35
1.2	0.76	0.8		0.1	0.77	0.6
1.14	0.29	0.2		0.94	1.68	0.44			Figure 1, figure supplement 1 F
0.16	0.36	0.38		0.14	0.43	0.91			feeding time 2h			feeding time 6h
0.53	0.42	0.52		1.01	1.45	0.05			percent time resting			percent
0.18	0.1	0.07		0.29	1.12	1.02			paramecia	flakes	shrimp	paramecia	flakes	shrimp
0.99	0.9	0.12		2	0.88	0.78			90.9	94.13	93.75	82.78	84.72	77.45
1.05	0.58	0.47		0.88	1.56	0.17			81.4	87.77	88.7	75.57	73	81.85
0.69	0.5	0.58		0.44	0.12	0.39			92.07	83.05	81.32	83.87	74.6	86.68
0.24	0.59	0.36		0.5	0.32	1.07			83.97	81.38	87.03	81.92	91.45	83.97
0.53	1.84	0.53		0.06	0.33	0.13			92.65	94.15	77.93	79.08	77.97	86.33
0.38	0.18	0.76		0.43	0.13	0.58			94.38	85.73	85.88	87.92	94.23	74.1
0.31	0.4	0.29		0.2	0.52	0.36			83.23	88.42	95.98	85.33	75.5	80.08
0.11	0.29	0.51		1.01	0.65	0.53			84.03	96	93.35	90.75	93.12	88.5
0.23	0.11	0.33		0.2	0.43	0.78			92.27	67.68	94.23	91.93	87.22	95.22
	0.29	0.16		0.79	0.33	0.52			87.1	84.55	84.67	90.92	80.42	90.18
	0.46			0.52	1.42	1.04			84.28	83.35	84.8	77.82	94	86.2
	0.59			0.6	1.54	1.72			73.18	96.98	84.88	97.52	73.27	92.02
	0.23			0.23		0.5			87.7	94.27	94.62	69.48	74.55	83.47
	0.4			0.52		3.94			82.23	81.68	85.22	85.55	83.37	93.85
						3.2			89.58	94.95	77.45	97.28	90	90.72
						0.23			65.65	88.23	90.25	83.82	75.87	73.1
						0.3			91.28	94.17	85.27	71.9	85.98	90.45
						2.09			89.2	89.37	90.48	70.7	65.75	78.82
									69.25	87.9	80.13	77.98	84.15	86.35
									75.4	85.9	94.97	77.65	67.63	70.28
									69.07	86.65	70.08	69.38	81.4	73.33
Figure 1, figure supplement 1 G									69.62	84.05	85.67	62.85	96.1	76.93
Flakes feeding experiment, paramecia consumption, % decrease									71.17	87.73	85.92	87.73	86.2	93.5
									76.28	71.43	92.23	70.98	78.05	78.15
NTR+, MTZ+									66.08	69.57	74.35	73.92	94.45	88.53
fsih #	min 1	min 5	min 10	min 15	min 20				75.6	83.75	84.93	97.35	82.05	82.15
1	100	56.25	18.75	18.75	0				78.5	87.58	80.67	80.17	65.2	85.82
2	100	76.92	76.92	61.54	46.15				91.93	91.2	88.32	92.93	83.7	81.15
3	100	47.83	13.04	17.39	8.7				85.62	88.83	85.05	77.75	70.57	96.77
4	100	90.91	81.82	81.82	36.36				92.03	97.67	94.18	84.02	76.25	77.73
5	100	47.37	15.79	15.79	10.53				76.68	78.18	95.45	66.78	84.72	80.93
6	100	90.32	61.29	51.61	38.71				78.65	84.58	89.52	80.08	74.1	91.43
7	100	46.15	23.08	7.69	7.69				79.35	84.08	87.17	88.27	91.72	85.95
8	100	100	100	88.24	88.24				98.33	86.3	89.92	87.33	92.26	79.27
9	100	100	77.78	72.22	66.67				97.32	73.02	96.8	98.11	90.22	95.77
10	100	100	80	56	44				97.29	91.72	95.15	88.72	95.01	86.78
									97.97	85.05	97.8	95.18	87.95	88.15
NTR+, MTZ -									98.99	97.53	96.5	84.33	90.52	86.77
fish#	min 1	min 5	min 10	min 15	min 20				98.3	98.83	97.95	95.03	89.21	84.15
1	100	100	107.14	57.14	21.43					94.68	98.8	86.37	92.06	87.84
2	100	58.33	25	33.33	33.33					97.46		88.71	71.04	81.2
3	100	100	94.12	64.71	35.29					96.85		83.27	65.87	69.02
4	100	95.45	90.91	90.91	90.91					98.04		94.33	94.33	90.67
5	100	40.91	27.27	18.18	13.64					97.54		87.7	87.7	62.75
6	100	64.71	47.06	35.29	23.53									68.5
7	100	92.59	85.19	70.37	62.96									90.79
8	100	87.5	56.25	37.5	25									92.76
9	100	100	91.67	91.67	83.33									75.99
