# Supplementary material for: Experience, circuit dynamics, and forebrain recruitment in larval zebrafish prey capture
Source: eLife. 2020 Sep 28;9:e56619. doi: 10.7554/eLife.56619 (PMC7561350; doi:10.7554/eLife.56619)
Supplement: Figure 1—source data 1. [file elife-56619-fig1-data1.csv]

Figure 1
Figure 1B left			Figure 1B middle left			Figure 1B middle right			Figure 1B right			Figure 1D
number of pursuits/minute			number of captures/minute			probablility of capture attempt						discriminability index
experienced	navie		experienced	navie		experienced	naïve		experienced	naïve		mean d' experienced	SEM experienced	mean d' naive	SEM naive
4.8	6.8		2.6	3.4		0.67	0.74		0.81	0.68		0.18	0.06	0.21	0.04
3.8	1.8		1.4	0.2		0.47	0.33		0.78	0.33		0.22	0.07	0.19	0.05
5.8	6.2		2	4.2		0.55	0.84		0.63	0.81		0.33	0.06	0.16	0.04
7.6	5.6		3.2	3		0.66	0.71		0.64	0.75		0.41	0.09	0.27	0.06
6	8.8		3.2	4.4		0.67	0.66		0.80	0.76		0.51	0.12	0.25	0.07
6.2	4.2		3	1.6		0.65	0.57		0.75	0.67
7	2.4		4	0.2		0.69	0.75		0.83	0.11
7.6	4.4		4.6	2.6		0.74	0.77		0.82	0.76
4.8	4.4		2.8	2.6		0.79	0.77		0.74	0.76
6	4		5.4	2.6		0.93	0.70		0.96	0.93		Figure 1E
5.8	4.4		3.2	1.8		0.76	0.55		0.73	0.75		response rate at highest contrast
3.4	0		1.8	0		0.65	0.91		0.82	0.93		experienced	naive
5.6	6.4		4.4	5.4		0.82	0.84		0.96	1.00		0.13	0
10.6	6.4		7	5.4		0.87	0.68		0.76	0.76		0	0
7.2	5		6.2	2.6		0.86	0.91		1.00	0.97		0	0
5.4	6.6		2.8	5.8		0.63	0.80		0.82	0.75		0	0.25
7.8	4		3.8	2.4		0.79	0.58		0.61	0.53		0	0
5.8	6.6		3.6	2		0.76	0.84		0.82	0.76		0	0
9.2	10		5.8	6.4		0.87	0.80		0.73	0.54		0	0
8.6	6		5.2	2.6		0.79	0.50		0.76	0.69		0	0
7.2	5.2		3.2	1.8		0.81	0.94		0.55	0.77		0	0
6.8	6.6		3	4.8		0.59	0.73		0.75	0.63		0.71	0.14
6.8	4.4		2.8	2		0.79	0.73		0.52	0.58		0.5	0
4.6	6.6		2.4	2.8		0.78	0.89		0.67	0.49		0.25	0
4.4	9.2		3.4	4		0.86	0.82		0.89	0.89		0.13	0.31
5.2	2.2		4.2	1.6		0.96	1.00		0.84	0.78		0.38	0
4.4	1.8		3.2	1.4		0.86	0.61		0.84	0.73		0.13	0
2.4	3.6		1.4	1.6		0.67	0.73		0.88	0.75		0	0
6	4.4		4	2.4		0.97	0.80		0.69	0.88		0.38	0
5.8	2		3	1.4		0.69	0.00		0.75	0.46		0.13	0
2.4	0		1.2	0		0.75	0.82		0.67	0.72		0	0
10.6	0.4		8.4	0		0.91	0.78		0.88	0.77		0.13	0
11	10		6.8	3.8		0.75	0.80		0.83	0.76		0.13	0
10.2	7.4		3.4	4.2		0.73	0.77		0.46	0.87		0.5	0
6.2	11		4.6	6.8		0.87	0.82		0.85	0.67		0.14	0.13
7.2	8.8		5.6	5.2		0.89	0.91		0.88	0.80			0
11.4	5.6		8	4		0.91	0.74		0.77	0.86			0
3.2	4.6		2.6	2.8		0.94	0.79		0.87	0.87
8	5.4		5.4	3.2		0.83	0.88		0.82	0.92
5.8	5.6		4.6	3.8		0.93	0.86		0.85	0.84
3.6	3.4		3	2.6		0.94	0.91		0.88	1.00
4.2	5.6		2.8	4.4		0.90	0.82		0.74	0.83
3.4	7		2.4	5.4		0.88	0.90		0.80	0.86
6	3.4		4.8	2.8		0.80	0.84		1.00	0.67
7.8	4		5.4	3		0.79	0.75		0.87	0.67
9	0		7.2	0		0.84	0.60		0.95	0.94
4.4	5		1.8	3.6		0.64	0.81		0.64	0.67
9.2	3.2		6.8	1.6		0.91	1.00		0.81
5	1		3.2	0.4		0.76			0.84
3.2	4.2		2	3.2		0.75			0.83
8.8	1.8		6.8	1.2		0.91			0.85
