# Supplementary material for: Experience, circuit dynamics, and forebrain recruitment in larval zebrafish prey capture
Source: eLife. 2020 Sep 28;9:e56619. doi: 10.7554/eLife.56619 (PMC7561350; doi:10.7554/eLife.56619)
Supplement: Figure 2—figure supplement 1—source data 1. [file elife-56619-fig2-figsupp1-data1.csv]

Figure2, figure supplement 1
Figure2, figure supplement 1B, mean fluorescence traces per brain region
experienced, spontaneous	frame #																														max convergence
region #	1	2	3	4	5	6	7	8	9	10	11	12	13	14	15	16	17	18	19	20	21	22	23	24	25	26	27	28	29	30	31	32	33	34	35	36	37	38	39	40	41	42	43	44	45	46	47	48	49
1	0.0285	0.022	0.0319	0.0086	0.0062	-0.0174	-0.052	-0.0689	-0.0077	0.0002	-0.0024	0.0206	0.0091	0.0014	0.0211	0.0238	0.0462	0.0307	0.053	0.0164	-0.0328	-0.0648	-0.0326	-0.0084	-0.0328	-0.0119	0.0006	-0.0223	0.0142	0.0688	0.1096	0.0611	0.1105	0.0633	0.0614	0.0745	0.0657	0.1309	0.1258	0.0975	0.1229	0.1433	0.1607	0.2019	0.1687	0.1571	0.1256	0.105	0.1057
2	0.0345	0.0733	0.0537	0.0442	0.0526	0.0137	-0.0108	-0.0365	0.0117	0.0268	0.0456	0.0107	-0.0378	0.0025	-0.0324	-0.0304	0.0019	-0.0223	-0.0434	-0.0256	-0.0534	-0.0478	0.0148	-0.0053	-0.0402	0.0236	0.041	0.0482	0.0457	0.1064	0.1272	0.1211	0.1435	0.111	0.1541	0.1304	0.0731	0.1415	0.1765	0.1603	0.1556	0.1316	0.1323	0.1435	0.1277	0.0888	0.1457	0.078	0.0461
3 (contra)	0.0349	-0.0073	0.0028	-0.0376	-0.0243	-0.0572	-0.0191	-0.0349	-0.0122	-0.0181	0.0225	0.0157	-0.0114	0.0629	0.0194	0.0127	0.03	0.0036	0.0291	-0.0049	-0.023	-0.019	0.0149	0.0127	0.0077	0.0788	0.1404	0.1655	0.2701	0.4165	0.5515	0.472	0.4427	0.4015	0.3785	0.3025	0.254	0.2598	0.1692	0.1436	0.1464	0.0993	0.0777	0.0394	0.0269	0.0603	0.0461	0.0392	0.0323
3 (ipsi)	0.0114	0.0329	0.014	-0.0167	-0.0144	-0.0591	-0.0125	-0.0364	0.0272	0.0505	0.0404	0.009	-0.0068	0.0131	0.0071	-0.02	-0.0282	0.0377	0.0217	-0.0048	-0.0079	-0.0054	-0.0367	0.009	-0.025	-0.0007	0.0346	0.0232	0.0364	0.0764	0.096	0.1486	0.2652	0.2032	0.1886	0.1287	0.1026	0.0877	0.0845	0.0609	0.0793	0.0576	0.0571	0.0301	0.0209	0.0075	0.0188	0.0035	-0.0092
4 (contra)	-0.0073	0.0006	0.0113	-0.0209	-0.0075	-0.0135	-0.0042	-0.0307	0.0032	-0.0023	0.0039	0.0168	0.0019	0.0048	0.0015	0.0008	-0.0003	-0.0018	0.0136	-0.0015	0.0034	0.0082	0.013	0.0067	0.0004	0.0144	0.0366	0.043	0.0452	0.074	0.099	0.0934	0.0955	0.0816	0.0648	0.0486	0.0375	0.0343	0.0346	0.0093	0.0219	0.0227	-0.0012	0.0062	-0.0065	-0.0044	-0.0124	-0.0125	0.0064
4 (ipsi)	0.0044	0.0046	0.0188	-0.0107	0.0038	-0.0149	0.0009	-0.0065	0.0172	0.0149	0.0159	0.0187	-0.0019	-0.0009	0.0003	-0.0015	-0.0057	-0.0091	-0.0026	-0.0042	-0.0212	-0.0076	-0.0006	-0.0064	-0.0057	0.0022	0.0077	0.0143	0.017	0.0361	0.069	0.0761	0.0968	0.0716	0.0654	0.0345	0.0286	0.0448	0.0374	0.0252	0.0349	0.0358	0.0135	0.0252	0.0114	0.0112	0.0008	-0.0125	0.0029
5	0.0009	0.0018	0.0163	-0.0097	0.0139	-0.0015	-0.0109	-0.0546	0.0196	-0.0108	0.033	0.0333	0.0218	-0.0057	-0.0006	0.0029	-0.021	-0.0036	-0.0086	-0.0102	-0.0009	-0.0173	0.0181	0.0073	-0.0132	0.023	0.0339	0.0269	0.0449	0.0992	0.1505	0.112	0.1306	0.11	0.1208	0.0807	0.0554	0.1006	0.0847	0.0496	0.0519	0.0596	0.0575	0.0556	0.0258	0.0411	0.021	0.0184	0.0283
6	0.1144	0.116	0.0639	-0.0358	-0.0296	-0.0952	-0.0428	-0.087	-0.0552	-0.0638	0.0676	0.1446	0.0712	0.0706	0.0443	0.0382	0.078	-0.0289	-0.0507	-0.186	-0.0705	-0.0867	0.0091	0.0163	-0.0018	0.1632	0.3742	0.6426	1.0534	2.0014	2.9277	2.9164	2.695	2.3615	2.024	1.5417	1.2968	1.3282	1.324	1.0952	0.9315	0.9235	0.758	0.6444	0.4987	0.4344	0.3252	0.38	0.3271
7	0.0334	0.0442	0.0398	0.0171	0.0185	-0.0061	0.0089	-0.0167	0.0615	0.0309	-0.0008	0.0423	0.0266	0.0047	-0.0206	0.0129	-0.0073	0.0107	-0.001	-0.0175	-0.044	-0.0407	-0.0329	-0.0877	-0.0762	-0.0404	-0.0597	-0.0564	-0.0096	0.061	0.108	0.1697	0.3033	0.3162	0.351	0.3271	0.3072	0.3237	0.3096	0.2817	0.298	0.361	0.3053	0.3026	0.2774	0.2422	0.2117	0.1996	0.1949
8	-0.0121	0.022	0.0473	-0.0146	0.0129	-0.0238	-0.0051	-0.0393	0.028	-0.0099	0.006	0.0221	0.0142	0.0165	-0.0136	-0.0173	-0.0099	0.0051	0.0035	-0.0089	-0.0204	-0.0111	0.0147	0.0109	-0.0171	0.0321	0.0563	0.0552	0.073	0.1864	0.2502	0.2357	0.2402	0.1726	0.1723	0.1319	0.1223	0.1708	0.1578	0.1007	0.1007	0.1186	0.0818	0.094	0.062	0.0518	0.0576	0.0554	0.0574
eye angle left [deg]	0.4768	-0.1021	-0.2685	0.7789	0.4143	0.062	-0.2958	0.8971	-0.1064	0.0366	0.0465	0.0178	-0.8218	-0.8862	-0.2491	-0.5749	0.7166	0.5924	0.1823	0.0758	-0.0961	-0.6266	0.2072	0.3648	1.2093	1.6824	1.5938	1.5898	2.3687	5.2642	14.9633	14.4907	14.0784	13.4278	12.804	12.3748	12.0669	10.8036	9.2355	8.6358	9.6752	9.253	9.428	9.1939	9.1594	9.4319	8.9171	9.2852	8.8189
eye angle right [deg]	0.4322	0.7662	0.5695	0.6306	0.3741	-0.4195	0.1252	0.2645	-0.7742	-0.1347	-0.4383	-0.4731	-0.8097	-0.2194	0.1066	-0.1898	-0.5586	-0.2426	-0.5869	-0.9682	-0.2355	-0.0718	-1.103	-0.6782	-0.2584	-0.6526	-0.5467	-0.6111	-0.1961	-0.8369	0.9052	0.6605	1.3419	1.7474	1.6516	1.4451	0.5095	0.8652	-0.5009	0.1381	0.0825	0.3867	-0.0149	0.0259	-0.0164	-0.3342	-0.2496	-0.0408	-0.326
tail angle left [a.u.]	-61.1238	240.3643	223.9238	-32.8798	-177.3857	175.7512	-261.344	-206.9452	393.019	-194.1238	117.4952	5.7631	178.3464	48.9179	-449.7786	-713.5643	-310.3679	-362.6119	-134.6893	107.4	71.4893	295.2988	662.0548	-357.2131	62.5667	-1525.2071	-1041.7726	-1638.5643	-5500.4631	-3306.3619	-12025.7667	-3185.5821	-1358.9512	-2478.5881	-299.1179	-747.5167	-427.8321	-907.606	-1503.85	-30.7369	-173.1655	129.1321	155.3524	269.894	-156.9571	-245.3798	70.1738	278.7274	-285.2548
tail angle right [a.u.]	144.3222	-112.9635	-87.2075	56.8103	-245.1004	-368.8028	110.0306	-176.5409	-12.3742	668.2329	343.2032	-9.0468	-120.3563	-205.6123	15.4056	210.7984	-42.5528	-40.8444	170.1377	295.5663	281.102	354.6377	116.0841	293.7806	355.8044	473.6079	-201.1659	163.4651	-93.1183	1302.9889	143.471	-256.8683	-134.9575	1069.9889	385.3401	287.5603	163.2032	966.8758	1798.2329	563.7925	616.2151	911.6079	176.6437	256.5127	323.1437	375.8817	67.2806	-119.1302	-312.7194
experienced, evoked
region #	1	2	3	4	5	6	7	8	9	10	11	12	13	14	15	16	17	18	19	20	21	22	23	24	25	26	27	28	29	30	31	32	33	34	35	36	37	38	39	40	41	42	43	44	45	46	47	48	49
1	0.0276	0.0554	0.0435	0.0552	0.0476	0.0391	0.0103	0.0154	0.0255	0.0583	0.0285	0.0133	-0.0047	-0.0128	-0.0355	-0.0452	-0.0255	-0.0292	-0.0189	-0.0316	-0.0294	-0.0197	-0.049	-0.0579	-0.0601	-0.067	-0.0546	-0.0323	0.0106	0.0015	-0.0425	0.0005	0.0291	0.0416	0.0511	0.0687	0.0548	0.0376	0.049	0.0547	0.0526	0.0581	0.0553	0.0829	0.0867	0.1026	0.0909	0.1254	0.1422
2	0.0461	0.0403	0.0385	0.0445	0.0247	0.0408	0.0093	-0.0039	0.022	0.0057	0.0266	0.0024	-0.0146	-0.0251	-0.0123	-0.0283	-0.0172	-0.0209	-0.0097	0.0124	-0.0118	-0.0438	-0.0277	-0.0438	-0.0543	-0.0524	-0.0209	-0.016	0.0238	0.0156	0.0439	0.0281	0.0214	0.0751	0.0401	0.0733	0.0634	0.0066	0.0822	0.101	0.0685	0.0651	0.0514	0.0922	0.0845	0.0722	0.0748	0.097	0.0997
3 (contra)	0.0684	0.0387	0.0538	-0.0193	-0.0202	-0.0149	-0.0253	-0.0466	-0.0324	-0.0387	-0.0395	-0.0288	-0.037	-0.0336	-0.009	-0.0394	-0.032	-0.0134	0.0055	-0.0083	-0.0198	-0.0243	0.0383	0.0956	0.1821	0.2698	0.3525	0.4957	0.8055	1.0793	1.0601	0.9335	0.7937	0.7076	0.6142	0.4833	0.4623	0.3888	0.3218	0.2795	0.2391	0.2297	0.2199	0.2282	0.1879	0.1679	0.1587	0.119	0.1392
3 (ipsi)	0.1009	0.0928	0.0641	0.0613	0.0381	0.0238	0.0008	0.0033	-0.0183	-0.0177	-0.0287	-0.0215	-0.0373	-0.02	-0.03	-0.0569	-0.0224	-0.0182	-0.0055	-0.0062	-0.012	-0.0126	-0.0126	-0.0363	-0.0287	-0.0403	-0.0309	-0.01	0.0129	0.0551	0.094	0.1068	0.1361	0.1433	0.0926	0.1006	0.0698	0.0634	0.0617	0.0751	0.1045	0.1049	0.108	0.1116	0.088	0.0604	0.0647	0.0612	0.0522
4 (contra)	0.0053	0.0095	0.0037	-0.0009	0.0088	-0.0001	0.0034	-0.0038	-0.0002	0.0001	0.0013	0.0056	0.004	-0.005	-0.0039	-0.0111	-0.011	-0.0061	-0.0072	-0.0051	-0.0095	-0.01	0.0043	0.0094	0.0186	0.0304	0.0514	0.0608	0.0834	0.109	0.1037	0.0814	0.0652	0.0543	0.0347	0.0249	0.0198	0.0089	0.0144	0.0032	0.001	-0.0003	-0.0079	-0.0027	0.0085	-0.003	-0.0137	0.0043	-0.0013
4 (ipsi)	0.0215	0.0261	0.024	0.0195	0.0189	0.018	0.0119	0.0024	-0.0037	-0.0064	-0.0042	0.001	-0.0038	-0.0093	-0.0054	-0.0074	-0.0043	-0.0069	-0.003	-0.0009	-0.0127	-0.013	-0.0134	-0.0227	-0.0261	-0.0227	-0.0167	-0.0174	-0.0026	-0.0007	0.0142	0.0084	0.019	0.0137	-0.0033	0.0069	0.0087	0.0096	0.0118	0.0061	0.0203	0.0241	0.0275	0.0244	0.0203	0.0122	0.0117	0.0234	0.0114
5	0.017	0.0294	0.0214	0.0086	0.0234	0.0112	0	0.0007	-0.0179	-0.0083	-0.0079	0.0044	-0.0007	-0.0243	-0.0041	-0.0175	-0.0056	-0.0064	0.0098	0.0061	-0.0131	-0.0121	-0.0055	-0.0082	-0.0004	0.0051	0.0175	0.0297	0.0581	0.0816	0.0997	0.0767	0.0788	0.0646	0.0485	0.0535	0.0481	0.0476	0.0429	0.0311	0.04	0.0464	0.031	0.0386	0.0409	0.0329	0.034	0.0425	0.0351
6	0.3751	0.3777	0.3679	0.3085	0.2161	0.0912	-0.0021	-0.06	-0.0817	-0.0744	-0.0149	0.0271	-0.0501	-0.1184	-0.1129	-0.1921	-0.149	-0.1061	-0.0477	-0.0464	-0.1593	-0.1587	-0.1371	-0.1415	-0.1111	0.1131	0.2651	0.413	0.9238	1.8282	2.4212	2.2524	1.9219	1.6738	1.39	1.1903	1.1609	1.1455	1.096	1.0725	1.1598	1.0582	0.9935	1.0214	0.9474	1.0189	0.9613	0.8773	0.9496
7	0.0299	0.0338	0.0321	0.045	0.0622	0.0503	0.0357	0.0285	0.026	0.0092	0.0111	0.0129	0.0108	0.0159	0.0171	0.0123	-0.0149	-0.035	-0.0287	-0.0321	-0.0526	-0.0711	-0.072	-0.0517	-0.0747	-0.0781	-0.0544	-0.0388	-0.0308	0.0246	0.0768	0.0936	0.1497	0.1464	0.1912	0.1962	0.2022	0.2049	0.212	0.1956	0.1743	0.1968	0.1995	0.2065	0.1922	0.1586	0.1444	0.1399	0.1219
8	0.0464	0.0552	0.0495	0.0281	0.03	0.0056	0.0036	0.0015	-0.0108	-0.0072	-0.0044	0.0084	-0.0178	-0.0115	-0.0204	-0.0261	-0.0087	-0.0136	-0.0055	-0.0107	-0.0383	-0.0132	-0.0148	-0.0168	-0.0084	0.0011	0.0284	0.0471	0.0818	0.1814	0.2346	0.2184	0.1938	0.1841	0.1563	0.1542	0.1664	0.1439	0.1603	0.1298	0.1394	0.1426	0.1041	0.1217	0.1069	0.1074	0.1073	0.1155	0.1064
eye angle left [deg]	-0.3914	-0.4771	-0.0721	-0.2371	-0.1637	-0.0179	0.0415	-0.1712	-0.2917	0.2627	0.7527	0.1855	0.0508	0.2886	0.2404	-0.1185	1.012	0.5722	0.8112	1.3436	1.2326	0.798	0.9938	0.9233	1.1989	0.9823	0.7436	0.18	-0.3679	-4.1903	-9.3746	-9.6874	-8.8793	-10.3398	-9.8983	-9.3626	-9.0077	-7.635	-7.0546	-6.2916	-6.3995	-6.1661	-5.5442	-5.666	-6.0524	-5.3072	-4.853	-4.3432	-4.3899
eye angle right [deg]	0.072	0.2222	-0.4383	-0.3306	0.4608	0.2661	-0.0939	0.026	0.385	0.448	-0.2259	-0.0544	-0.0525	-0.6527	-0.0319	0.6396	-0.0804	-0.1956	-0.0125	0.7654	0.2443	0.1209	0.8356	0.9974	1.004	0.9672	0.8978	1.0084	1.5336	1.2683	3.3381	3.5115	3.2624	4.5174	4.3236	4.3908	4.1758	3.4694	2.5206	2.8771	2.7862	2.5657	2.9303	2.7209	2.8941	2.6038	2.6951	3.0704	2.8759
tail angle left [a.u.]	-62.658	-45.484	-194.39	-77.765	-94.115	208.444	140.242	94.586	149.353	-48.911	2.625	-54.824	-18.515	-161.177	162.588	-135.846	7.85	147.891	99.522	58.684	33.65	97.426	79.136	120.11	-29.249	-560.434	-2040.662	-613.024	-970.922	-2175.195	-5634.005	-4019.028	-1124.751	-1052.198	-720.572	-138.717	150.498	-128.504	-181.576	-287.333	-1320.305	-233.853	111.03	-847.462	-672.977	-412.902	-39.402	-192.945	52.543
tail angle right [a.u.]	514.753	80.14	114.363	528.135	31.755	-16.315	-197.706	-89.818	-205.692	-150.716	-40.228	-198.388	-70.659	-132.157	-167.468	102.12	2529.27	43.252	820.113	251.738	614.657	471.134	199.926	267.275	320.992	1510.507	390.302	574.62	158.138	-70.195	1647.652	405.056	948.702	487.203	248.54	878.95	846.639	2175.706	2079.341	1192.419	683.234	808.548	445.111	432.925	774.934	320.774	845.079	-103.974	626.45
naive, spontaneous
region #	1	2	3	4	5	6	7	8	9	10	11	12	13	14	15	16	17	18	19	20	21	22	23	24	25	26	27	28	29	30	31	32	33	34	35	36	37	38	39	40	41	42	43	44	45	46	47	48	49
1	-0.0005	0.0087	0.0116	0.0279	0.0247	-0.0004	-0.0069	0.0132	-0.0304	-0.0245	-0.0037	-0.0033	-0.0032	0.0257	0.038	0.0221	0.0306	0.0125	-0.0129	-0.0216	-0.0168	-0.0201	-0.0335	-0.0338	-0.0034	0.027	-0.0015	0.0491	0.0535	0.1397	0.1392	0.1454	0.1492	0.1453	0.1673	0.1852	0.2008	0.1781	0.1445	0.163	0.1838	0.1752	0.1763	0.188	0.1829	0.1436	0.1565	0.1434	0.1606
2	0.0357	0.0097	0.0303	0.033	0.0197	-0.0048	0.0076	0.0275	-0.0414	0.0081	0.0036	-0.0034	-0.0078	0.0102	0.0628	0.0017	0.0157	-0.0418	-0.0149	-0.0099	-0.0144	-0.0515	-0.0317	-0.041	-0.0032	0.0238	0.0036	0.0172	0.0319	0.0869	0.0866	0.0978	0.0992	0.1608	0.1808	0.1924	0.2252	0.1312	0.1812	0.1619	0.1691	0.1094	0.1388	0.0825	0.0899	0.0592	0.0611	0.073	0.0692
3 (contra)	0.0344	0.0666	0.0303	0.0319	0.0167	0.0047	0.0289	-0.0087	-0.0025	-0.0264	-0.0411	-0.037	-0.0536	-0.0156	0.0283	0.0055	-0.0129	-0.0377	-0.0352	0.0071	0.0116	-0.01	-0.0069	-0.0213	0.0428	0.0951	0.0968	0.1345	0.2905	0.5706	0.5972	0.5527	0.5406	0.5047	0.4637	0.3886	0.3124	0.3009	0.2854	0.2533	0.1977	0.1807	0.2174	0.1291	0.1785	0.1549	0.1163	0.0634	0.0597
3 (ipsi)	0.0879	0.0629	0.0715	0.0468	0.0313	0.0372	0.0051	-0.0165	-0.0562	-0.0518	-0.0424	-0.0163	0.0019	-0.0084	0.0122	0.0319	0.0149	-0.0262	-0.0382	0.0218	-0.0103	-0.0517	-0.0304	-0.024	-0.0532	-0.0051	-0.037	0.0282	0.0266	0.0405	0.0825	0.1482	0.2866	0.2738	0.2085	0.2778	0.2352	0.1221	0.093	0.0676	0.0446	0.0604	-0.0181	0.0294	0.0381	-0.0007	0.0051	0.0522	0.0749
4 (contra)	0.0094	0.0092	-0.0025	0.0012	0.0022	-0.0017	0.0131	0.0088	-0.0076	-0.0039	-0.0238	-0.0139	-0.0181	-0.0023	0.0128	0.0166	0.0087	0.0087	0.003	0.0027	-0.005	-0.0155	-0.0041	-0.0059	0.0077	0.0312	-0.0036	0.0282	0.0558	0.0843	0.0798	0.0829	0.0628	0.0659	0.0586	0.0515	0.0477	0.0301	0.0353	0.0193	0.0261	0.0158	0.0199	0.0023	0.0098	0.0264	0.0116	0.0016	-0.0013
4 (ipsi)	0.0188	0.0161	0.0026	0.0147	0.0014	-0.0117	-0.0056	-0.0001	-0.0091	-0.0051	-0.014	-0.0127	-0.0062	0.0093	0.0166	0.0086	0.007	0.0009	-0.0046	0.0048	-0.015	-0.0184	-0.0006	-0.0073	0.0097	0.0143	-0.005	0.0026	0.0079	0.0249	0.0431	0.0714	0.0609	0.0621	0.0647	0.0607	0.0514	0.0349	0.0383	0.0096	0.0171	0.0172	-0.0003	0.0003	-0.0031	0.0131	-0.0063	-0.0003	0.0026
5	0.0293	0.0247	0.0162	0.0132	0.012	-0.0109	-0.0173	0.005	-0.0163	-0.0095	-0.0459	-0.017	-0.008	0.0008	0.0253	0.012	0.005	0	-0.0243	0.0045	-0.0059	-0.008	-0.0026	-0.0106	0.0283	0.0377	0.0079	0.029	0.0575	0.096	0.0846	0.0974	0.0938	0.1113	0.0831	0.0951	0.0865	0.0652	0.0565	0.0456	0.0454	0.0544	0.0466	0.0334	0.0228	0.037	0.0223	0.0129	0.0268
6	0.0731	-0.0719	-0.1222	-0.1519	-0.2176	-0.2722	-0.1903	-0.0914	-0.1066	-0.1232	-0.1496	-0.0762	0.0382	0.1428	0.2915	0.2657	0.2258	0.1045	0.0892	0.073	-0.01	-0.0153	0.0303	0.0893	0.1752	0.2992	0.2699	0.4301	0.9149	1.7269	2.3332	2.1865	2.0645	2.2993	2.0205	1.6407	1.365	1.0884	0.9676	0.8412	0.7919	0.7123	0.598	0.5207	0.4754	0.4725	0.3494	0.3389	0.4058
7	0.0161	-0.0041	0.0251	0.0326	0.0104	-0.0439	0.0043	-0.0013	0.0075	0.0056	-0.0176	-0.0202	-0.0019	-0.0279	0.0011	0.0004	-0.0033	-0.0233	-0.0046	0.0024	0.0036	-0.0201	0.0022	0.0164	0.0405	0.0707	0.0456	0.0681	0.0603	0.1254	0.1504	0.2752	0.2621	0.3193	0.378	0.3923	0.4069	0.3701	0.3637	0.3294	0.3075	0.2975	0.2811	0.2611	0.2418	0.2286	0.2051	0.1916	0.151
8	0.0059	0.0102	-0.0119	0.0128	0.0011	-0.0416	-0.0067	0.0121	-0.0236	-0.0215	-0.0348	0.004	-0.0114	0.0048	0.0139	0.0057	0.011	0.009	-0.003	0.0089	-0.0026	0.0033	0.0084	0.0098	0.036	0.0673	0.0127	0.0435	0.0737	0.128	0.1306	0.1507	0.1271	0.1943	0.1787	0.1835	0.165	0.121	0.1293	0.1057	0.1057	0.1009	0.0962	0.069	0.0606	0.0827	0.0395	0.0382	0.0446
eye angle left [deg]	-1.1707	-0.0515	-1.0038	-0.9595	-0.7037	-0.6476	-0.4714	0.7341	0.6706	0.1447	0.1039	0.0486	1.0348	1.1882	1.0832	1.2646	0.5201	0.3801	1.1553	0.4898	0.5464	0.6674	-0.6829	-1.2658	-1.1952	-1.5847	-1.6778	-3.1577	-4.3754	-6.2189	-12.2562	-11.2762	-10.6668	-9.6739	-10.1172	-9.6243	-9.8884	-8.3998	-8.1568	-7.7671	-8.332	-7.4798	-7.7977	-6.9781	-6.9055	-7.2847	-6.4735	-6.3746	-6.7662
eye angle right [deg]	-0.7573	0.0598	-0.1308	-0.3231	-0.7915	0.2805	-0.1581	0.6957	0.8719	-0.0202	-0.0491	-0.0483	-0.1707	0.0855	0.4557	0.1743	0.1359	-0.4614	-0.0185	0.5109	0.202	0.2692	-0.5315	0.0383	-1.3373	-1.5938	-0.5622	-0.2138	0.0003	-0.1255	4.0972	3.8634	4.0487	4.343	4.574	3.7973	4.4312	3.175	3.1997	3.6657	3.2898	2.5686	2.6945	2.8397	3.1961	2.6763	2.4805	2.8955	2.4636
tail angle left [a.u.]	17.996	204.1424	238.5156	211.6644	198.8871	256.6567	152.9966	66.393	67.5281	-16.726	81.7579	-146.0326	-183.0028	6.3805	-1157.157	-166.7534	-113.7933	-273.51	-99.4588	250.315	294.3133	379.7008	-1301.1237	-251.7635	215.796	-1336.4558	-169.9219	-312.8475	-1151.057	-2201.4189	-6747.035	-3831.7987	-1938.2701	-3629.3992	-797.5362	-336.0094	180.1258	-197.5867	110.7359	10.2502	409.1079	79.5525	-91.4367	-42.6254	190.7662	-253.254	210.3722	168.9115	-1805.4487
tail angle right [a.u.]	-224.8157	-365.0699	-541.4252	-371.9276	-193.2425	-318.2592	-412.9568	-149.9919	-60.302	-471.3907	-59.2157	161.0414	697.8117	1757.417	552.3271	773.2414	-224.2121	2.2658	-171.7699	1347.2605	288.7789	36.473	-203.7592	-413.0615	45.4682	-620.9121	-0.9699	820.2254	568.5414	73.8724	530.139	-149.1562	-246.9264	5957.5045	2375.6051	1212.7468	694.1914	892.2379	300.0539	598.4111	-48.1854	70.5748	-490.1074	-209.1407	-266.9913	1199.9801	14.9111	243.745	183.3075
naïve, evoked
region #	1	2	3	4	5	6	7	8	9	10	11	12	13	14	15	16	17	18	19	20	21	22	23	24	25	26	27	28	29	30	31	32	33	34	35	36	37	38	39	40	41	42	43	44	45	46	47	48	49
1	-0.0035	-0.0015	-0.019	-0.0097	-0.0069	-0.0113	-0.0054	-0.0088	-0.0005	-0.0082	-0.0059	-0.0191	-0.0082	-0.0058	0.0055	0.0022	0.0088	0.0031	0.0073	0.0231	0.0051	0.009	0.0163	0.0255	0.0082	0.0144	0.0279	0.0506	0.0571	0.1257	0.1715	0.1494	0.1599	0.17	0.2023	0.2031	0.2093	0.2047	0.2049	0.1924	0.1892	0.1935	0.1786	0.1755	0.1463	0.1227	0.1346	0.1205	0.121
2	-0.0154	0.016	0.0077	0.0035	0.0051	0.0022	-0.0051	-0.0202	0.0062	-0.0054	0.0018	-0.0294	0.0014	0.0047	-0.0003	-0.0117	-0.0025	0.0011	-0.0013	0.0011	0.0216	-0.0108	0.0077	0.0185	0.0032	-0.0065	-0.0162	0.0145	0.0259	0.0529	0.1238	0.1064	0.1189	0.1075	0.1182	0.1264	0.1243	0.1173	0.1165	0.1222	0.1102	0.1187	0.0989	0.0976	0.0822	0.0593	0.068	0.0623	0.0762
3 (contra)	0.0199	0.0258	0.017	0.0487	0.0373	0.0103	0.0192	-0.0059	-0.016	-0.0293	-0.0008	-0.0091	-0.0053	-0.0181	-0.0358	-0.023	-0.0297	-0.0021	-0.0262	-0.0362	-0.0015	-0.0031	0.0291	0.0069	0.0281	0.0576	0.125	0.2119	0.3742	0.636	0.7244	0.6373	0.6063	0.5663	0.5099	0.457	0.4121	0.369	0.3129	0.2721	0.2345	0.2116	0.1932	0.1817	0.1471	0.1348	0.1222	0.0919	0.1126
3 (ipsi)	0.0028	0.0081	0.0196	0.0274	-0.0025	0.0104	0.0192	0.0194	0.0351	0.001	0.0135	-0.0081	-0.0081	-0.0192	-0.0246	-0.0222	-0.0111	-0.018	0.0044	-0.0055	-0.006	-0.0017	-0.0176	0.005	-0.0213	-0.0036	-0.0134	-0.0059	-0.0188	0.0183	0.0338	0.0515	0.0759	0.0891	0.0928	0.1168	0.126	0.1073	0.0778	0.0599	0.03	0.0141	0.0113	0.019	0.006	0.0112	-0.0012	0.0165	0.008
4 (contra)	0.0047	0.0121	0.0087	0.0097	0.0027	-0.0071	0.0013	-0.0085	0.0005	-0.0009	0.0016	0.0032	-0.0046	-0.0032	-0.0019	0.0007	0.0036	-0.0014	-0.0027	-0.0026	-0.0012	-0.0077	-0.0025	-0.0035	-0.001	0.0051	0.0088	0.0233	0.0386	0.0699	0.0853	0.0788	0.0776	0.0654	0.0626	0.0515	0.0472	0.0518	0.0449	0.0432	0.0295	0.0199	0.0257	0.026	0.0178	0.013	0.0197	0.0107	0.0177
4 (ipsi)	-0.0081	-0.0064	-0.0069	-0.0068	-0.0057	-0.0057	0.0063	0.0008	0.0096	0.0006	0.0081	0.0059	0.0042	0.0063	-0.0008	0.0008	0.0059	0.0008	0.0019	0.0062	0.0021	-0.0077	0.001	-0.0058	-0.0067	-0.0053	-0.0166	-0.0172	-0.0136	-0.0037	0.0097	0.0122	0.0141	0.0042	0.008	0.0002	0.0041	0.0057	0.0068	0.0011	-0.0009	-0.0063	-0.0045	-0.0003	-0.0083	-0.0072	-0.0056	-0.0085	-0.0021
5	-0.0043	0.0134	0.002	0.0103	0.0067	-0.0069	-0.0037	-0.006	0.0045	0.0049	-0.0005	-0.0035	-0.0006	-0.0032	-0.0109	-0.005	-0.0119	-0.0012	-0.0025	0.006	0.0061	-0.0062	0.0082	0.0087	-0.0044	-0.005	-0.0009	0.0109	0.017	0.037	0.0763	0.0773	0.0771	0.0596	0.0649	0.0479	0.0508	0.057	0.0458	0.0403	0.0291	0.0212	0.029	0.028	0.0202	0.0124	0.0209	0.0121	0.02
6	0.1196	0.1087	0.0902	0.0254	0.0155	-0.0085	0.0496	0.0269	0.0495	-0.0092	-0.0478	-0.0899	-0.0719	-0.0969	-0.0757	-0.0011	-0.0303	-0.0747	-0.113	-0.0746	-0.0289	-0.0266	0.0546	0.0845	0.1246	0.0357	0.0049	0.055	0.2275	0.8927	1.8313	1.8596	1.6747	1.4932	1.3989	1.1742	0.9428	0.9101	0.6984	0.5481	0.4866	0.5043	0.5066	0.3398	0.2802	0.2733	0.256	0.2494	0.2138
7	-0.0297	-0.008	-0.0152	0.0071	0.0034	-0.0115	0.0147	0.0052	0.0144	0.0061	0.0211	-0.0046	-0.0025	0.0001	0.0093	-0.0103	-0.0006	-0.0164	0.0065	0.0022	0.0102	-0.0047	0.0049	-0.0023	0.0005	0.0117	-0.0071	0.0197	0.0183	0.0316	0.0697	0.1353	0.1554	0.1781	0.182	0.1819	0.1849	0.1861	0.1785	0.1741	0.1505	0.1565	0.1533	0.1588	0.1491	0.1255	0.1295	0.1121	0.1201
8	0.0037	0.0196	-0.0019	-0.0065	-0.006	-0.0029	-0.0011	-0.0049	0.0134	0	0.0113	-0.0057	0.0018	-0.0031	-0.0061	-0.0059	-0.0098	-0.0102	-0.0043	0.005	0.0021	-0.006	0.0034	0.0101	0.004	0.0017	0.0057	0.0058	0.0205	0.0745	0.147	0.14	0.1414	0.1193	0.1342	0.1181	0.1021	0.1105	0.0913	0.0809	0.0791	0.0867	0.0644	0.0584	0.0505	0.0451	0.0546	0.0439	0.0472
eye angle left [deg]	0.1324	0.1513	0.1491	-0.1118	0.1078	0.3634	0.057	-0.3332	-0.0012	-0.0982	-0.4445	-0.1848	-0.7293	0.9221	0.02	0.332	0.4008	0.802	1.3575	0.2762	0.0105	0.5885	0.8643	0.6523	0.4726	0.1626	0.2317	-0.3483	-1.5352	-1.9644	-10.6496	-10.5979	-11.0805	-11.1075	-10.2976	-9.4301	-9.7508	-7.7185	-7.5211	-7.4585	-7.4213	-6.864	-5.6659	-5.6564	-5.8348	-5.5606	-5.5477	-4.9645	-4.654
eye angle right [deg]	-0.7204	-0.361	-0.6289	-0.1448	-0.4178	-0.3236	0.2056	0.2928	0.1766	0.3209	0.1456	0.2977	-0.1644	0.7908	0.5307	1.3059	0.3055	0.2915	0.3818	-0.6958	-0.6414	-0.1279	0.0062	0.0844	0.0503	-0.6523	-0.2938	-0.009	0.1634	0.0985	3.3885	2.8623	3.0125	4.6671	4.5284	4.7319	4.5917	3.5396	3.489	3.2766	3.4378	2.706	3.0301	2.3512	2.2437	2.1988	2.5162	2.0968	1.6476
tail angle left [a.u.]	-889.6091	-203.0742	-314.6566	-55.408	-197.9591	297.8778	153.63	-95.8602	316.1037	283.5816	-99.2055	360.8891	169.1777	331.1031	-56.5903	505.7806	609.5694	532.9029	632.7509	581.3882	531.3596	225.8125	580.9289	808.6175	348.3156	778.3876	790.6982	575.053	-249.8846	-91.4689	-4472.3532	-3834.3388	-1832.2398	-1257.2118	-593.2089	-345.7622	445.2616	-59.0462	644.8706	300.1444	393.7027	413.3149	67.3159	449.088	408.747	357.852	450.3232	350.0203	326.6897
tail angle right [a.u.]	433.1629	0.9395	81.7638	510.6501	452.6171	-48.8284	-23.1144	-289.6783	-50.0615	-167.2274	-196.7766	-155.2115	-49.0857	-197.8456	-301.304	-107.5023	112.8377	-226.7066	-384.7353	-289.09	-308.8077	834.3904	-87.7599	188.5193	-257.3595	-229.6518	-191.4593	-130.5257	-175.9901	-169.6311	428.2238	-199.6111	198.9661	532.5472	1374.1844	761.6246	344.2777	1306.6098	673.6209	-6.0023	-36.8241	357.541	373.0915	83.0848	22.2467	-88.379	279.1659	80.0058	719.4519
Figure 2, figure supplement 2C, telencephalon evoked quantification 5 frames after convergence [Fz]
experienced							naive
fish # / frame #	31	32	33	34	35		fish # / frame #	31	32	33	34	35
1	0.1109	0.1115	0.0873	0.0939	0.1411		1	0.0492	0.0315	0.0784	0.0735	0.1536
2	0.0095	0.0386	0.0632	0.0875	0.1227		2	-0.0754	-0.0503	-0.0003	0.0131	-0.0213
3	0.0293	0.0218	0.0206	0.0343	0.0402		3	0.069	0.1043	0.0717	0.0494	0.1092
4	0.1447	0.1605	0.1776	0.2227	0.2622		4	0.0595	0.04	0.0129	0.0316	0.0067
5	0.0323	0.0072	0.0027	0.0319	0.0481		5	0.0803	0.0647	0.0629	0.0966	0.1225
6	0.063	0.0279	0.051	0.0839	0.1184		6	-0.4759	-0.2266	-0.0914	-0.0405	-0.0676
7	0.1459	0.1807	0.1338	0.0964	0.0608		7	-0.0042	0.0398	0.0698	0.0676	0.0548
8	0.0698	0.082	0.1749	0.1773	0.1453
9	0.1088	0.133	0.1249	0.1528	0.1813
10	0.3255	0.2405	0.2399	0.2306	0.2885
11	0.1403	0.1213	0.1421	0.0993	0.1571
12	0.827	0.6055	0.632	0.7153	0.8412
13	0.2225	0.2123	0.2286	0.1843	0.223
Figure 2, figure supplement 2D, habenula evoked quantification 5 frames after convergence [Fz]
experienced							naive
fish # / frame #	31	32	33	34	35		fish # / frame #	31	32	33	34	35
1	0.1105	0.1399	0.1589	0.0389	0.2002		1	0.1212	0.0794	0.0617	0.083	0.0321
2	0.0459	0.0804	0.0932	0.0947	0.0881		2	-0.0055	-0.029	-0.0241	0.0612	-0.0217
3	0.127	0.0811	0.1748	0.1345	0.0174		3	-0.0053	-0.0129	0.0295	-0.0212	0.0398
4	0.0603	0.1364	0.0724	0.0871	0.1351		4	0.0141	0.0213	0.0347	0.0937	-0.0016
5	0.0229	0.0109	-0.0757	0.0492	0.0887		5	0.1337	0.1213	0.1034	0.1069	0.114
6	0.0686	0.0676	0.0769	0.0645	0.1379		6	0.0436	-0.0564	-0.111	0.137	0.055
7	0.0831	0.1472	0.1644	0.1268	0.1414		7	0.0058	0.0728	0.0556	0.0649	0.063
8	0.0376	0.0115	0.1226	0.0989	0.1285
9	0.1847	0.1674	0.1713	0.2381	0.1799
10	0.195	0.179	0.1391	0.16	0.1809
11	0.0678	0.0392	0.0566	0.0197	0.0251
12	0.4225	0.2011	0.2349	0.1787	0.0774
13	0.1835	0.1217	0.1567	0.1062	0.1366
[truncated: 12 more columns]
