# Supplementary material for: Experience, circuit dynamics, and forebrain recruitment in larval zebrafish prey capture
Source: eLife. 2020 Sep 28;9:e56619. doi: 10.7554/eLife.56619 (PMC7561350; doi:10.7554/eLife.56619)
Supplement: Figure 2—source data 1. [file elife-56619-fig2-data1.csv]

Figure 2
Figure 2F					Figure 2H
right		left			mean fluorescence [Fz]
tail flicks		eye convergences			region	frame number	1	2	3	4	5	6	7	8	9	10	11	12	13	14	15	16	17	18	19	20	21	22	23	24	25	26	27	28	29	30	31	32	33	34	35	36	37	38	39	40	41	42	43
experienced	naive	experienced	naive		1	telencephalon	-0.028	-0.051	-0.064	-0.034	-0.009	-0.004	0.021	0.062	0.021	0.037	-0.017	-0.024	0.005	0.041	0.024	0.007	0.029	0.039	0.012	-0.007	-0.007	-0.005	-0.033	-0.02	0.008	0.003	0.034	0.05	0.025	0.103	0.109	0.133	0.125	0.153	0.181	0.207	0.187	0.163	0.166	0.162	0.147	0.137	0.117
0.58	0.46	0	0.09		2	habenula	-0.065	0.08	0.052	0.014	0.004	-0.008	0.025	0.022	-0.013	-0.055	-0.052	-0.048	-0.03	0.04	0.03	-0.039	0.029	0.067	0.062	0.008	-0.04	-0.03	-0.026	0.041	-0.069	-0.025	0.025	0.025	-0.007	0.096	0.185	0.167	0.171	0.238	0.18	0.184	0.194	0.182	0.124	0.134	0.087	0.047	0.103
2.45	1.9	0.95	0.17		3	pretectum contra	-0.023	-0.054	-0.025	-0.071	-0.006	-0.023	0.019	-0.028	-0.085	-0.048	0.004	0.012	0.099	0.101	0.049	0.037	-0.005	0.007	0.011	-0.04	0.007	-0.012	0.004	0.048	0.02	0.141	0.245	0.246	0.33	0.803	0.92	0.986	0.985	1.062	0.934	0.89	0.738	0.647	0.559	0.522	0.417	0.357	0.368
0.37	-1.15	0.86	0.09		3	pretectum ipsi	-0.078	-0.109	-0.067	-0.065	-0.126	0.001	0.085	0.092	0.076	0.048	0.084	0.047	0.028	-0.005	-0.033	0.035	-0.024	-0.038	-0.05	-0.03	-0.01	0.055	0.076	0.046	-0.036	0.005	0.014	-0.081	-0.058	-0.003	-0.019	-0.003	0.076	0.073	0.002	0.194	0.142	0.08	0.079	0.11	0.064	0.043	0.067
5.47	-0.86	0.43	-0.14		4	tectal neuorpil contra	-0.015	-0.008	0.007	-0.007	0.002	-0.019	-0.003	-0.016	-0.025	-0.026	-0.023	-0.008	-0.003	0	-0.005	0.001	0.022	0.035	-0.001	-0.014	0.014	0.015	0.008	0.042	0.027	0.065	0.058	0.054	0.063	0.131	0.15	0.14	0.142	0.134	0.108	0.093	0.058	0.041	0.036	0.032	0.023	0.023	0.025
1.04	0.39	0.35	0.09		4	tectal neuropil ipsi	0.009	0	-0.004	-0.005	-0.003	0.001	0.008	0.012	0.016	0.014	0.013	0.02	0.01	0.011	0.001	-0.013	0.004	0.008	-0.021	-0.03	-0.018	-0.012	-0.011	0.006	-0.016	0.006	0	-0.015	-0.007	0.005	0.035	0.042	0.029	0.032	0.03	0.05	0.032	0.025	0.026	0.041	0.021	0.024	0.025
0	-0.86	0.46	0.26		5	tectal PVN	-0.013	0.009	0.022	0.016	0	-0.007	0.023	0.039	-0.007	0.031	-0.008	-0.015	-0.008	0.022	0.01	-0.004	0.033	-0.001	-0.038	-0.046	-0.044	0.017	-0.036	0.029	-0.023	0.019	0.021	-0.001	-0.01	0.027	0.053	0.068	0.055	0.103	0.061	0.061	0.056	0.042	0.012	0.048	0.025	0.012	-0.003
0.89	0.95	0.12	0.35		6	cerebellum	-0.02	-0.07	-0.047	-0.107	0.089	0.172	0.113	0.106	0.02	0.022	-0.052	-0.023	0.047	0.162	0.032	-0.104	-0.072	0.049	-0.167	-0.151	-0.086	0.067	-0.018	0.093	-0.053	0.156	0.3	0.139	0.176	0.806	1.7	1.857	1.705	1.622	1.53	1.152	0.821	0.624	0.33	0.329	0.18	0.206	0.112
0.6	0.52	0.03	0.32		7	crista cerebellaris	-0.038	0.009	-0.003	-0.023	-0.006	-0.007	0.043	0.044	-0.011	0.02	0.024	0.019	-0.004	0.019	0.02	0.001	0.014	-0.015	-0.046	-0.043	0.007	0.019	-0.013	0	-0.03	0.01	0.063	0.029	0.008	0.043	0.14	0.234	0.296	0.326	0.304	0.264	0.273	0.197	0.178	0.161	0.101	0.133	0.098
1.21	2.45	0.52	0.2		8	hindbrain	0	0.031	0.009	-0.015	0.032	0.014	0.024	0.042	0	-0.012	0.007	-0.017	0.008	0.022	0.005	-0.018	0.003	0.012	-0.015	-0.046	-0.05	-0.014	-0.024	0.031	-0.029	0.028	0.033	0.022	0.011	0.052	0.135	0.18	0.204	0.189	0.192	0.184	0.139	0.109	0.075	0.105	0.083	0.111	0.058
-1.76	-0.49	-0.2	0		9	eye angle left [deg]	0.413	-0.029	0.336	0.266	-0.78	-0.114	-0.066	0.44	-0.133	0.064	0.1	-0.333	0.001	0	-0.164	-0.035	-0.052	0.155	0.118	-0.294	0.739	-0.043	0.168	0.483	0.276	-0.666	-0.501	-0.189	-0.575	-1.901	-6.516	-6.737	-6.356	-6.474	-5.912	-5.279	-4.732	-3.613	-3.711	-3.592	-3.474	-3.311	-3.145
-0.69	4.61	0.37	0.43		10	eye angle right [deg]	0.112	-0.052	-0.003	-0.09	-0.389	-0.413	-0.006	-0.518	-0.07	0.156	-0.945	-0.343	0.595	1.669	0.296	0.35	0.732	-0.105	-0.137	-0.09	0.079	0.038	0.14	0.29	0.618	0.13	0.257	0.229	0.892	0.557	2.083	2.881	2.598	3.216	3.543	1.906	2.53	2.848	2.179	2.487	2.387	2.358	2.551
1.01	3.54	0.37	0.72		11	tail anlge left [a.u.]	-744	-162.522	140.061	119.561	-41.356	129.811	158.478	-50.272	-37.689	247.394	-175.772	93.394	262.228	-251.356	312.061	-32.772	-207.189	40.394	1.894	-87.856	87.061	475.061	236.644	47.394	129.478	348.728	-168.356	498.728	461.311	-418.272	-5474.439	-2984.522	-1214.606	-1434.106	-188.606	-882.439	-26.772	83.061	-50.939	79.394	-219.106	55.144	109.228
1.3	-2.02	1.04	0.37		11	tail angle right [a.u.]	602.778	-45.306	-283.889	-62.722	502.611	26.278	-128.889	-152.972	0.111	-321.722	165.944	-145.306	-131.722	-87.722	62.528	-40.639	-218.056	-208.389	-52.889	-82.056	-503.556	-17.639	-123.389	319.444	294.611	-123.639	55.028	-218.472	-321.472	-124.056	-90.056	-306.306	111.278	1045.778	507.861	1.694	-237.472	287.361	-222.222	-582.472	-106.306	137.861	15.778
3.43	0.84	0.95	0
-0.49	-0.43	0.03	-0.46
2.28	4.06	0.84			standard deviation [Fz]
-0.43	3.17	0.09			region	frame number	1	2	3	4	5	6	7	8	9	10	11	12	13	14	15	16	17	18	19	20	21	22	23	24	25	26	27	28	29	30	31	32	33	34	35	36	37	38	39	40	41	42	43
0.6	5.88	-0.14			1	telencephalon	0.129	0.134	0.119	0.147	0.157	0.147	0.155	0.155	0.112	0.116	0.103	0.109	0.092	0.162	0.127	0.1	0.131	0.141	0.181	0.107	0.154	0.164	0.177	0.183	0.18	0.12	0.172	0.163	0.187	0.221	0.228	0.235	0.195	0.186	0.172	0.152	0.153	0.233	0.231	0.227	0.198	0.198	0.189
0.43	0.45	1.15			2	habenula	0.179	0.127	0.129	0.157	0.11	0.126	0.121	0.179	0.139	0.145	0.099	0.14	0.044	0.116	0.157	0.186	0.103	0.128	0.14	0.145	0.168	0.199	0.192	0.132	0.161	0.087	0.126	0.19	0.173	0.259	0.205	0.275	0.239	0.178	0.175	0.151	0.19	0.217	0.286	0.19	0.218	0.256	0.219
1.38					3	pretectum contra	0.13	0.107	0.081	0.135	0.112	0.086	0.11	0.083	0.13	0.108	0.111	0.098	0.312	0.208	0.174	0.162	0.117	0.077	0.089	0.084	0.07	0.089	0.092	0.162	0.14	0.217	0.27	0.282	0.327	0.758	0.743	0.901	0.824	0.837	0.806	0.771	0.724	0.793	0.605	0.659	0.533	0.427	0.421
3.8					3	pretectum ipsi	0.164	0.154	0.166	0.107	0.155	0.171	0.294	0.337	0.337	0.226	0.282	0.195	0.12	0.136	0.164	0.141	0.116	0.235	0.17	0.165	0.19	0.234	0.27	0.269	0.232	0.194	0.204	0.205	0.161	0.231	0.229	0.191	0.208	0.224	0.252	0.39	0.365	0.277	0.158	0.128	0.164	0.116	0.204
0.63					4	tectal neuorpil contra	0.077	0.059	0.086	0.106	0.081	0.066	0.056	0.051	0.036	0.051	0.046	0.048	0.067	0.052	0.048	0.076	0.074	0.085	0.09	0.059	0.062	0.085	0.069	0.083	0.081	0.065	0.078	0.086	0.029	0.163	0.12	0.126	0.125	0.113	0.105	0.12	0.128	0.132	0.091	0.096	0.096	0.122	0.083
0.78					4	tectal neuropil ipsi	0.048	0.026	0.025	0.045	0.033	0.056	0.024	0.039	0.05	0.049	0.031	0.072	0.048	0.037	0.033	0.035	0.039	0.036	0.04	0.025	0.034	0.043	0.073	0.051	0.057	0.051	0.061	0.045	0.04	0.057	0.054	0.06	0.054	0.054	0.065	0.075	0.067	0.087	0.088	0.089	0.078	0.075	0.086
0.33					5	tectal PVN	0.064	0.058	0.077	0.073	0.041	0.082	0.046	0.065	0.038	0.071	0.064	0.057	0.051	0.061	0.052	0.076	0.064	0.056	0.069	0.055	0.067	0.068	0.084	0.07	0.076	0.05	0.062	0.104	0.052	0.094	0.058	0.087	0.085	0.071	0.079	0.074	0.077	0.108	0.095	0.059	0.069	0.123	0.064
1.01					6	cerebellum	0.208	0.241	0.277	0.254	0.405	0.493	0.258	0.254	0.251	0.323	0.183	0.129	0.246	0.347	0.312	0.269	0.361	0.164	0.189	0.191	0.336	0.245	0.278	0.279	0.283	0.494	0.632	0.617	0.343	1.059	1.25	1.453	1.408	1.18	1.305	1.191	0.861	0.802	0.638	0.42	0.345	0.263	0.364
					7	crista cerebellaris	0.122	0.128	0.101	0.111	0.081	0.093	0.079	0.092	0.066	0.09	0.111	0.111	0.108	0.083	0.096	0.077	0.104	0.105	0.078	0.046	0.055	0.085	0.096	0.118	0.084	0.062	0.08	0.136	0.099	0.125	0.153	0.276	0.327	0.316	0.308	0.288	0.236	0.175	0.127	0.135	0.114	0.143	0.143
					8	hindbrain	0.055	0.093	0.088	0.078	0.067	0.078	0.06	0.091	0.068	0.088	0.065	0.079	0.059	0.086	0.085	0.071	0.088	0.067	0.075	0.067	0.072	0.082	0.08	0.063	0.102	0.094	0.084	0.091	0.064	0.152	0.159	0.171	0.157	0.134	0.143	0.164	0.129	0.158	0.104	0.067	0.071	0.107	0.093
					9	eye angle left [deg]	0.574	1.428	0.672	0.71	1.793	1.112	0.553	0.78	0.862	1.151	0.527	1.039	0.586	2.71	1.161	0.886	0.853	0.723	0.819	1.447	3.217	2.397	2.385	1.899	1.67	2.92	3.652	3.035	2.639	4.837	5.614	6.029	4.473	4.542	3.916	3.841	3.449	2.776	3.057	2.981	3.089	3.362	2.913
					10	eye angle right [deg]	1.433	1.205	1.157	0.973	0.886	1.13	0.815	1.179	1.102	0.886	4.385	0.897	1.755	4.915	0.963	1.349	1.244	1.197	0.929	1.141	1.363	1.26	1.111	1.294	1.387	1.464	1.233	1.276	1.705	1.309	2.562	2.439	2.163	2.985	3.232	3.744	2.378	2.516	2.594	2.146	2.091	1.948	2.809
					11	tail angle left [a.u.]	2004.251	879.474	767.05	805.754	957.292	871.955	594.459	813.418	576.664	674.432	492.717	813.507	606.404	826.672	605.033	756.183	821.219	725.929	435.108	526.822	810.627	656.82	674.563	805.654	768.308	875.532	1237.297	646.648	919.945	2517.26	7911.808	4417.211	2688.954	3408.28	775.637	1274.834	963.251	984.499	812.231	788.237	606.722	680.613	604.482
					11	tail angle right [a.u.]	2058.635	905.468	678.239	891.542	1078.298	785.502	506.665	863.905	867.883	967.966	696.616	506.239	739.114	696.498	655.14	644.165	880.948	601.114	680.107	589.677	601.54	377.319	732.643	690.405	683.699	581.049	642.582	695.326	911.686	708.371	800.659	814.034	746.815	4220.437	1363.774	565.262	847.466	679.402	700.276	623.098	615.944	693.695	561.532
[truncated: 18 more columns]
