# Supplementary material for: Experience, circuit dynamics, and forebrain recruitment in larval zebrafish prey capture
Source: eLife. 2020 Sep 28;9:e56619. doi: 10.7554/eLife.56619 (PMC7561350; doi:10.7554/eLife.56619)
Supplement: Figure 3—figure supplement 1—source data 1. [file elife-56619-fig3-figsupp1-data1.csv]

Figure 3, figure supplement 1
Figure3, figure supplement 1A, delay receptive fields
i) left, pretectum
0.0023	-0.0041	-0.0048	-0.0039	0.0056	0	-0.0069	-0.0099	-0.0222	-0.0349	-0.0344	-0.0428	-0.0489	-0.0526	-0.057	-0.0552	-0.0612	-0.0642	-0.0665	-0.08
0.0005	-0.0053	-0.0057	-0.0067	0.0033	-0.0024	-0.0104	-0.0126	-0.0242	-0.0383	-0.0369	-0.0452	-0.0517	-0.0554	-0.059	-0.0583	-0.0644	-0.0675	-0.0705	-0.083
-0.0505	-0.0454	-0.039	-0.0345	-0.0254	-0.0315	-0.0429	-0.0525	-0.0661	-0.0813	-0.0721	-0.0714	-0.0739	-0.09	-0.0899	-0.091	-0.1029	-0.122	-0.1257	-0.121
-0.1077	-0.1009	-0.0903	-0.0768	-0.0664	-0.101	-0.1179	-0.1279	-0.1315	-0.1374	-0.1366	-0.1346	-0.1211	-0.1321	-0.1381	-0.1476	-0.1534	-0.1665	-0.1858	-0.2056
-0.0746	-0.0737	-0.076	-0.0935	-0.1071	-0.1498	-0.1802	-0.1776	-0.1721	-0.1794	-0.1798	-0.1815	-0.1799	-0.1878	-0.1842	-0.1777	-0.1898	-0.1963	-0.2072	-0.2288
-0.0178	-0.0473	-0.0541	-0.0789	-0.0701	-0.069	-0.0784	-0.0886	-0.1022	-0.1271	-0.1465	-0.1703	-0.2206	-0.2027	-0.1929	-0.1768	-0.1624	-0.1275	-0.1175	-0.1523
-0.0105	-0.0431	-0.0334	-0.046	-0.0335	-0.0172	-0.003	-0.0163	-0.0611	-0.092	-0.0818	-0.1267	-0.192	-0.2043	-0.2146	-0.1989	-0.1925	-0.1546	-0.1298	-0.164
-0.0189	-0.0585	-0.0607	-0.0337	-0.0124	-0.0236	-0.0104	-0.0134	-0.0605	-0.0825	-0.0756	-0.1013	-0.1556	-0.1866	-0.2078	-0.2076	-0.1935	-0.2032	-0.2049	-0.2654
-0.0351	-0.0859	-0.1037	-0.0915	-0.0538	-0.0376	-0.0337	-0.0423	-0.0853	-0.0799	-0.0628	-0.0531	-0.0852	-0.1029	-0.1225	-0.1442	-0.1834	-0.2022	-0.2628	-0.3064
-0.0774	-0.1103	-0.1312	-0.1046	-0.0738	-0.0732	-0.0924	-0.0858	-0.1008	-0.0765	-0.0728	-0.074	-0.0325	0.0051	-0.0333	-0.0797	-0.1399	-0.1813	-0.2192	-0.2753
-0.0654	-0.0763	-0.0689	-0.0573	-0.0485	-0.0494	-0.0629	-0.0548	-0.0679	-0.0888	-0.1086	-0.089	-0.0369	-0.002	-0.0486	-0.0956	-0.1271	-0.1416	-0.1605	-0.1935
0.0458	0.0182	0.0333	0.0578	0.0848	0.0809	0.0659	0.06	0.0079	-0.0146	-0.0274	-0.0188	-0.0127	-0.0202	-0.0615	-0.065	-0.0733	-0.0804	-0.0702	-0.0781
0.1281	0.1154	0.1286	0.1421	0.1574	0.1473	0.1252	0.1024	0.0571	0.0261	0.0253	0.0082	-0.0095	-0.014	-0.0213	-0.0226	-0.0262	-0.0225	-0.0222	-0.0115
0.1474	0.1406	0.1509	0.1616	0.1737	0.1855	0.1938	0.1788	0.1493	0.1132	0.0941	0.0616	0.0184	0.0062	0.019	0.0285	0.0281	0.0387	0.0424	0.0476
0.0669	0.0754	0.083	0.1133	0.1754	0.1953	0.212	0.2453	0.2432	0.2135	0.1829	0.1512	0.1308	0.1186	0.1278	0.1457	0.1441	0.1753	0.1878	0.1873
0.0327	0.0554	0.0679	0.0991	0.1432	0.1522	0.1619	0.187	0.1811	0.1536	0.1372	0.1171	0.1078	0.088	0.0836	0.1042	0.0982	0.1056	0.0989	0.0941
0.0144	0.0217	0.0273	0.0307	0.0427	0.0348	0.0236	0.0276	0.0168	-0.0021	-0.0045	-0.0176	-0.0289	-0.0306	-0.0398	-0.0403	-0.0446	-0.048	-0.0507	-0.0622
0.0025	-0.0035	-0.0041	-0.0033	0.0062	0.0005	-0.0065	-0.0094	-0.0216	-0.0345	-0.0341	-0.0425	-0.0488	-0.0523	-0.0568	-0.0551	-0.0611	-0.0641	-0.0664	-0.0798
0.0023	-0.0041	-0.0048	-0.0039	0.0056	0	-0.0069	-0.0099	-0.0222	-0.0349	-0.0344	-0.0428	-0.0489	-0.0526	-0.057	-0.0552	-0.0612	-0.0642	-0.0665	-0.08
Figure 3, figure supplement 1 A i) right
0.0129	0.009	0.0079	0.0086	0.0084	0	0.0024	0.0041	0.0068	-0.0048	-0.0002	0.006	0.008	0.0092	0.0121	0.018	0.0169	0.0149	0.0199	0.0265
0.0115	0.0095	0.007	0.0052	0.006	0.0013	0.0033	0.001	0.0033	-0.0074	-0.0008	0.0047	0.0086	0.0094	0.0107	0.0148	0.0137	0.0145	0.0185	0.0241
0.0028	0.0104	-0.0014	-0.002	-0.0143	-0.0332	-0.0431	-0.0548	-0.043	-0.05	-0.0246	-0.023	-0.0256	-0.0237	-0.0324	-0.0401	-0.0448	-0.0279	-0.0179	-0.0075
-0.0229	-0.0153	-0.026	-0.0341	-0.0443	-0.0599	-0.0813	-0.0912	-0.1006	-0.107	-0.09	-0.0962	-0.0851	-0.0827	-0.0843	-0.0948	-0.1068	-0.0782	-0.0637	-0.0506
-0.0335	-0.0389	-0.0769	-0.0737	-0.063	-0.0402	-0.0423	-0.0402	-0.0568	-0.1073	-0.1125	-0.0963	-0.0908	-0.0892	-0.0791	-0.0886	-0.1067	-0.0849	-0.0805	-0.0648
-0.0298	-0.0713	-0.0909	-0.0661	-0.0621	-0.0368	-0.0203	0.0026	-0.0243	-0.0817	-0.1098	-0.0579	-0.039	-0.032	-0.0212	-0.0375	-0.0471	-0.0388	-0.0468	-0.0578
-0.0044	-0.0474	-0.0689	-0.0951	-0.0968	-0.094	-0.0791	-0.0777	-0.0863	-0.1007	-0.1238	-0.0836	-0.0804	-0.0381	0.0062	0.0335	0.0395	0.0309	0.0045	0.0098
0.0327	0.0009	-0.0097	-0.0352	-0.0558	-0.0982	-0.1169	-0.1263	-0.1207	-0.1419	-0.1454	-0.0998	-0.0928	-0.0401	0.026	0.0865	0.0927	0.0763	0.0635	0.0609
0.0433	0.0603	0.0687	0.0654	0.0286	-0.0561	-0.085	-0.0835	-0.0723	-0.1054	-0.0961	-0.0605	-0.0146	0.0224	0.0139	0.0281	0.0285	0.0437	0.0579	0.0604
0.0271	0.0811	0.1004	0.1018	0.0541	-0.0088	0.0072	0.0245	-0.0098	-0.0613	-0.0058	0.0357	0.0771	0.0717	0.0183	-0.0481	-0.0673	-0.0418	0.0019	0.0329
0.0242	0.0597	0.0779	0.0703	0.0602	0.0424	0.0465	0.0049	-0.0287	-0.0586	-0.0299	-0.0093	0.0096	0.0464	0.0577	0.0091	-0.0205	-0.0052	0.0137	0.0496
-0.0008	0.0009	0.0261	0.042	0.0554	0.0457	0.042	0.0266	-0.0002	-0.017	0.0022	0.0045	0.0086	0.0703	0.1305	0.1295	0.0934	0.0927	0.0739	0.0766
0.0252	-0.0162	-0.0056	0.0316	0.0517	0.0318	0.0401	0.0528	0.0669	0.0612	0.0613	0.0463	0.0557	0.0805	0.0967	0.1195	0.1047	0.0991	0.0873	0.0777
0.0517	0.0389	0.014	0.027	0.0481	0.0608	0.0969	0.1237	0.1533	0.1821	0.1848	0.1599	0.1394	0.1196	0.092	0.0758	0.051	0.0307	0.0338	0.0627
0.0695	0.0893	0.1195	0.13	0.1446	0.1544	0.1705	0.1881	0.2067	0.2088	0.2205	0.227	0.2159	0.1828	0.1527	0.1376	0.1081	0.0968	0.1174	0.1267
0.0552	0.0933	0.1387	0.1441	0.1566	0.1637	0.1738	0.1772	0.1822	0.162	0.1818	0.1955	0.1955	0.1924	0.182	0.1795	0.167	0.1489	0.1585	0.1428
0.0392	0.0442	0.061	0.0672	0.0716	0.0683	0.0734	0.0758	0.0864	0.0754	0.0818	0.0886	0.0867	0.0765	0.0676	0.0704	0.0658	0.0547	0.0571	0.057
0.0139	0.0102	0.0094	0.0103	0.0103	0.002	0.0044	0.0062	0.0092	-0.0024	0.0023	0.0083	0.01	0.0109	0.0134	0.0192	0.018	0.0157	0.0208	0.0272
0.0129	0.009	0.0079	0.0086	0.0084	0	0.0024	0.0041	0.0068	-0.0048	-0.0002	0.006	0.008	0.0092	0.0121	0.018	0.0169	0.0149	0.0199	0.0265
Figure 3, figure supplement 3A ii) left, delay histogram pretectum [counts]
experienced
19	14	7	6	1	8	10	6	8	12	3	11	8	8	6	18	14	9	20	36
10	8	11	13	12	13	21	11	15	17	21	18	10	7	14	6	7	11	12	21
49	19	8	15	10	18	30	22	15	11	16	7	6	11	10	9	10	7	15	26
10	19	17	16	15	12	13	20	10	18	15	13	20	9	12	12	12	14	14	6
30	24	8	11	19	8	14	18	14	7	14	12	14	18	32	20	19	25	42	69
17	9	10	13	21	16	17	24	29	21	10	15	14	16	9	15	13	14	17	27
3	1	2	9	8	22	26	24	18	22	25	23	27	31	20	19	17	13	9	19
7	15	16	19	14	9	16	22	19	30	20	28	22	13	24	26	20	19	22	10
14	5	10	9	15	34	26	20	13	15	7	4	5	3	0	2	0	4	8	13
13	10	12	19	21	24	44	43	37	20	17	28	8	12	10	1	3	8	11	13
35	21	10	12	11	4	16	23	13	18	15	11	5	7	8	8	10	12	29	32
25	10	10	14	28	36	26	21	18	25	17	21	16	11	11	6	6	3	12	54
8	4	9	13	15	16	21	10	16	17	24	11	14	10	15	11	10	18	27	89
12	15	24	17	27	31	40	39	36	26	25	17	18	10	14	12	8	5	3	10
37	16	11	10	14	13	30	49	24	37	7	8	5	3	10	5	6	7	10	42
22	15	15	4	6	4	9	11	14	16	9	15	12	18	15	19	16	23	20	66
15	8	12	17	31	51	49	33	16	16	17	13	6	8	8	4	15	9	5	19
63	26	31	23	19	30	28	19	13	14	15	9	8	12	11	9	11	16	24	45
58	29	23	12	27	32	31	48	42	19	18	4	2	5	5	4	3	10	10	13
16	17	15	7	12	16	16	45	71	47	22	6	18	8	4	7	5	5	12	17
16	13	19	9	16	18	19	15	13	9	4	6	9	8	12	5	15	14	24	57
18	13	8	9	11	23	37	20	15	21	15	12	13	14	14	11	22	10	9	31
43	21	14	16	7	5	14	13	16	19	15	13	10	9	15	17	6	10	9	29
naive
36	12	28	22	18	20	19	26	17	21	13	14	20	9	16	17	11	11	16	25
24	10	13	10	10	23	24	19	19	14	9	14	5	11	10	13	8	12	12	30
17	18	16	20	20	28	32	30	18	29	23	8	9	1	6	7	9	6	9	13
28	11	12	9	11	8	15	14	9	12	8	15	9	13	11	18	10	15	11	36
23	16	15	7	12	10	15	19	18	16	19	22	22	14	15	13	16	17	18	30
5	7	9	8	12	10	13	11	11	12	10	18	12	17	12	7	7	9	22	41
25	11	8	10	18	26	39	28	25	26	32	23	12	4	5	1	2	4	4	13
10	3	13	6	8	3	16	10	15	16	19	42	30	15	6	17	30	23	28	45
16	8	17	14	28	38	21	22	19	25	20	14	12	15	18	3	22	28	14	32
8	5	9	14	18	84	50	48	34	27	22	15	9	4	4	2	1	0	7	5
23	7	8	6	19	28	48	29	28	35	12	12	12	15	23	18	16	8	9	25
22	11	12	23	17	15	26	18	31	21	13	18	20	18	16	10	8	17	10	23
44	17	14	6	11	4	8	14	9	17	18	13	19	14	15	24	21	20	19	29
30	22	13	16	14	9	26	13	16	13	13	12	14	21	9	13	8	14	17	44
36	18	24	18	22	22	10	29	39	23	7	9	13	8	6	4	5	9	9	11
33	13	11	11	5	3	9	9	14	12	10	11	18	15	7	16	9	25	24	69
37	20	19	27	23	20	13	9	8	16	13	10	14	7	7	10	4	12	15	23
Figure 3, figure supplement 1, ii) right, delay histograms tectal neuropil [counts]
experienced
657	346	273	251	238	204	206	187	238	220	247	203	215	215	215	231	254	268	312	548
630	438	333	314	253	254	251	263	300	303	323	317	274	309	301	379	378	392	414	824
629	303	247	221	232	157	225	227	219	208	235	226	244	254	247	215	249	290	330	654
169	354	332	330	315	349	354	303	269	311	340	293	371	359	312	336	286	338	281	140
763	397	253	270	302	210	218	240	270	256	223	235	287	255	301	312	348	333	399	915
524	344	302	252	224	212	272	281	289	254	241	297	321	340	288	259	338	280	326	542
460	273	254	295	251	265	295	286	264	237	234	294	262	236	279	304	288	295	320	561
153	330	369	321	341	284	338	426	356	429	427	419	441	376	449	374	403	400	417	194
497	258	266	263	210	223	319	265	277	202	229	236	195	269	249	238	241	260	315	613
574	357	320	279	290	310	218	280	242	216	245	220	214	216	218	218	244	300	271	583
547	284	248	224	169	166	175	191	197	198	206	196	220	227	260	277	225	274	278	496
456	234	258	288	292	201	370	359	343	379	319	329	315	310	302	280	302	293	288	565
571	291	227	193	192	152	223	222	256	238	255	258	231	222	202	256	272	313	370	938
455	265	214	212	191	173	234	225	244	205	211	201	234	171	160	206	189	216	283	504
646	334	297	240	201	187	209	254	250	240	214	169	149	154	173	156	190	236	377	798
390	207	201	183	157	106	161	189	223	258	237	221	251	274	312	321	331	349	392	709
432	209	216	207	200	144	211	222	214	194	227	210	229	227	242	236	217	230	285	519
578	271	247	199	200	186	206	194	195	171	193	214	201	266	238	252	293	341	433	770
631	359	301	257	296	278	312	374	382	284	254	192	165	172	150	146	176	209	238	452
547	288	262	231	197	106	230	335	386	380	270	259	247	202	174	172	183	192	260	474
677	350	241	189	177	127	143	161	171	188	195	224	177	162	218	204	254	281	316	627
245	163	135	173	202	236	377	354	310	280	306	279	234	276	239	263	250	277	239	388
629	281	253	227	177	59	132	211	209	216	231	215	204	206	192	232	230	236	255	439
naive
524	311	347	253	239	160	235	294	298	321	316	268	296	304	312	282	250	264	292	518
725	374	321	276	221	177	207	215	257	220	243	218	219	289	282	280	293	311	291	570
595	334	270	262	225	256	261	221	225	249	289	247	232	235	210	215	256	290	359	651
439	288	218	220	216	228	206	219	304	236	246	266	225	246	276	272	267	302	376	712
629	342	230	238	218	185	233	212	202	252	276	291	309	288	320	331	334	363	490	971
382	172	169	209	203	170	237	218	205	213	273	272	254	247	210	218	284	306	452	886
486	254	204	175	175	159	186	181	172	170	171	151	125	181	216	233	230	309	340	741
262	119	139	102	103	39	85	142	163	186	214	226	272	210	300	397	456	479	583	1018
315	186	233	232	250	162	280	238	255	282	305	271	268	254	204	236	269	205	199	431
536	275	284	295	386	421	368	316	301	348	306	214	199	195	152	111	107	106	188	247
585	300	248	235	279	243	306	300	285	237	250	247	211	244	246	199	228	210	282	477
406	220	176	214	177	207	233	234	246	217	230	236	220	208	177	212	232	240	280	556
498	264	212	252	223	43	184	223	276	216	206	206	223	268	237	287	221	245	242	492
490	255	197	180	157	205	187	191	173	176	179	215	205	222	225	229	278	277	362	802
559	329	269	311	211	130	222	372	312	256	241	248	267	220	262	235	255	276	312	581
506	220	176	151	130	87	114	142	126	158	206	218	238	216	241	302	314	419	514	1214
618	299	281	280	241	192	217	243	253	198	220	198	174	194	221	248	214	232	314	583
Figure 3, figure supplement 1B, mean preferred angle [deg]
left pretectum		right pretectum			left tectal neuropil		right tectal neuropil
experienced	naive	experienced	naive		experienced	naive	experienced	naive
12.22	9.86	12.08	9.27		10.47	10.57	10.09	10.51
11.16	7.88	10.13	11.82		10.68	9.96	11.29	10.64
11.51	8.18	7.91	9.05		10.26	9.67	11.22	11.38
9.6	11.15	10.33	10.95		10.27	11.47	10.43	11.25
13.33	11.05	11.32	11.1		11.19	11.44	10.73	11.9
10.63	10.88	10.84	13.33		10.61	12	10.78	12.29
12.17	8.66	11.53	8.54		10.8	11.83	10.79	11.15
11.22	11.9	11.13	14.1		10.95	14.18	10.9	13.97
7.84	12.76	9.37	8.01		10.75	10.65	10.7	10.89
9.71	7.41	8.51	8.51		9.24	8.21	10.99	9.21
8.73	8.67	12.04	12.11		10.8	9.54	10.59	10.58
11.9	8.36	7.44	11.89		11.08	9.85	10.54	11.83
16.8	10.96	10.3	11.11		11.56	10.68	11.46	10.8
6.98	7.94	10.12	13.32		10.37	9.9	10.73	13.21
6.7	7.9	11.79	8.2		9.69	10.94	11.27	10.08
12.12	13.83	13.55	10.61		11.49	14.27	12.79	11.67
7.87	10.87	9.53	6.72		10.61	9.55	11.36	11.14
8.09		9.93			11.15		11.74
5.43		8.81			8.98		9.63
9.03		9.7			10.28		9.92
9.74		13.41			10.18		11.12
11.27		9.85			11.4		10.84
9.16		10.36			10.13		10.47
Figure 3, figure supplement 1C, standard deviation preferred angle [deg]
left pretectum		right pretectum			left tectal neuropil		right tectal neuropil
experienced	naive	experienced	naive		experienced	naive	experienced	naive
6.28	5.89	6.78	6.09		6.64	6.28	6.52	6.02
5.87	5.58	5.28	5.88		6.57	6.57	6.36	6.56
6.17	4.74	6.01	5.4		6.31	6.35	6.79	6.53
5.94	6.11	5.08	6.66		5.54	6.4	5.42	6.31
6.16	6.52	6.87	5.61		6.57	6.74	6.86	6.42
5.87	5.98	5.53	5.57		6.3	6.13	6.17	6.48
3.84	4.92	4.94	4.41		6.2	6.87	6.21	6.66
5.19	4.76	5.36	5.56		5.33	5.66	5.44	5.89
4.68	5.96	5.76	4.22		6.4	5.94	6.29	5.76
5.25	4.15	4.05	2.84		6.15	5.39	6.6	5.63
6.28	5.22	6.58	4.69		6.36	6.22	6.61	6.2
6.29	5.3	4.02	5.28		5.94	6.35	5.89	6.07
4.49	6.52	5.52	6.48		6.63	6.38	6.62	6.31
4.18	5.67	4.35	6.09		6.4	6.58	6.35	6.29
3.91	4.94	6.4	5.59		6.57	6.34	6.98	6.32
6.69	6.5	5.97	6.73		6.35	6.06	6.04	7
4.22	5.99	5.41	5.91		6.24	6.26	6.35	6.81
6.25		6.93			6.87		6.49
4.62		4.99			6.48		5.8
3.61		5.5			6.1		6.11
5.88		7			6.72		6.97
6.35		4.75			5.79		5.33
6.26		6.61			6.5		6.59
Figure 3, figure supplement 1C left, pretectal fequency [events/min]						Figure 3, figure supplement 1C right, pretectal amplitude [Fz]
evoked		spontaneous				evoked		spontaneous
experienced	naive	experienced	naive			experienced	naive	experienced	naive
3.89	5.44	9.33	1.56			0.7735	0.493	0.5828	0.3547
7.78	5.6	11.15	8.81			0.8234	0.7581	0.6157	0.7049
9.49	10.89	7.52	10.63			0.9872	0.8584	0.7947	0.6223
7.26	7	8.55	16.33			0.7713	0.6646	0.6701	0.8174
6.07	8.71	7	1.61			0.9685	0.7473	0.6172	0.3559
7.15	6.38	8.55	5.96			0.9569	0.6216	0.9158	0.6859
5.44	6.07	4.41	7.26			0.4426	1.1584	0.4893	0.6766
6.53	13.22	3.63	9.85			0.7198	0.9475	0.4496	0.5967
9.8	8.86	8.81	6.74			0.9681	1.194	0.7133	0.5924
6.22	5.6	10.89	11.66			0.5338	1.0669	0.5927	0.6732
11.98	11.15	8.04	17.37			0.8159	0.9403	0.4944	0.8278
9.95	8.71	10.63	7.78			0.7841	1.2481	0.5634	0.4975
8.24	8.55	5.44	4.15			0.9316	1.1218	0.734	0.7451
11.35	7	7.52	8.29			0.994	0.7571	0.5867	0.5668
8.4	6.22	6.22	9.59			0.9857	0.7878	0.6491	0.6364
10.42	5.91	13.74	10.37			0.9284	0.6824	0.6244	0.6745
10.73	8.81	3.63	2.33			1.0238	1.0346	0.6236	1.1049
7.31	4.67	10.89	10.37			0.9386	0.8854	0.8771	0.5097
12.91	7	18.14	2.18			0.8754	0.6169	1.073	0.3862
4.2		7.31	4.41			0.5467		0.5347	0.5948
9.33		5.7	9.07			0.8332		0.7935	0.7337
5.91		10.89	5.44			0.8773		0.6656	0.7836
8.86		8.04	3.6			1.017		0.8032	1.0203
10.11		11.66				0.8166		0.6662
5.44		7.48				0.6178		0.7573
		0.26
