# Supplementary material for: Experience, circuit dynamics, and forebrain recruitment in larval zebrafish prey capture
Source: eLife. 2020 Sep 28;9:e56619. doi: 10.7554/eLife.56619 (PMC7561350; doi:10.7554/eLife.56619)
Supplement: Figure 3—source data 1. [file elife-56619-fig3-data1.csv]

Figure 3
Figure 3 C, example pixel receptive fields in pretectum
left, pixel 15
0.0096	0.0096	0.0078	-0.0385	-0.1766	-0.1122	-0.024	-0.0075	-0.017	-0.0002	0.045	0.0334	0.0347	0.0659	0.0211	0.0031	0.0088	0.0096	0.0096
0.0096	0.0095	0.0008	-0.1174	-0.2314	-0.1548	-0.0763	-0.0504	-0.0457	-0.0044	0.0984	0.1221	0.1095	0.1003	0.0287	-0.0338	0.0009	0.0093	0.0096
0.0096	0.0094	-0.0029	-0.129	-0.2241	-0.1528	-0.1086	-0.0915	-0.0686	-0.0076	0.1229	0.244	0.2543	0.1762	0.0686	-0.0222	0.0002	0.0098	0.0096
0.0096	0.0092	-0.0108	-0.108	-0.1466	-0.12	-0.1046	-0.0887	-0.0704	-0.0018	0.1039	0.261	0.2933	0.304	0.2278	0.1184	0.0773	0.015	0.0096
0.0097	0.0088	-0.0193	-0.0719	-0.113	-0.088	-0.0666	-0.0503	-0.0462	-0.0029	0.0658	0.1549	0.2268	0.2669	0.2688	0.1832	0.1006	0.0234	0.0097
middle, pixel 72
0.0165	0.0165	0.0157	-0.0065	-0.0982	-0.0826	-0.015	0.0149	0.0355	0.0497	0.0286	0.026	0.034	0.036	-0.0057	0.007	0.0156	0.0165	0.0165
0.0165	0.0165	0.0127	-0.0472	-0.1411	-0.1195	-0.0598	-0.0083	0.0414	0.0481	0.0642	0.0582	0.0768	0.0513	-0.019	-0.0441	0.0043	0.0161	0.0165
0.0165	0.0164	0.0093	-0.0755	-0.1723	-0.1441	-0.0824	-0.0027	0.0612	0.0719	0.0923	0.1236	0.1188	0.079	-0.0145	-0.0579	-0.0144	0.0157	0.0165
0.0165	0.0163	0.0038	-0.0723	-0.1181	-0.0897	-0.0332	0.0567	0.116	0.173	0.1409	0.1517	0.1382	0.1398	0.0687	-0.0016	0.0284	0.0183	0.0165
0.0165	0.0162	0.0041	-0.036	-0.0797	-0.0279	0.0189	0.1126	0.1421	0.1593	0.1556	0.1258	0.1109	0.1192	0.1139	0.0537	0.0435	0.0203	0.0165
right, pixel 15
-0.0321	-0.032	-0.0316	-0.0239	-0.028	-0.0557	-0.0292	-0.0319	-0.0794	-0.1287	-0.0983	-0.0753	-0.0694	-0.0845	-0.0839	-0.0436	-0.0331	-0.0321	-0.0321
-0.0321	-0.032	-0.0296	-0.0078	-0.0267	-0.0784	-0.0649	-0.0826	-0.1457	-0.1388	-0.1396	-0.1396	-0.121	-0.1122	-0.1095	-0.068	-0.0394	-0.0323	-0.0321
-0.0321	-0.0319	-0.0186	0.0999	0.1334	-0.002	-0.036	-0.0954	-0.1409	-0.1222	-0.1439	-0.1768	-0.1691	-0.1389	-0.1296	-0.1029	-0.0382	-0.0322	-0.0321
-0.0321	-0.0314	0.017	0.2735	0.3735	0.2965	0.1544	0.0566	-0.061	-0.0836	-0.1217	-0.1062	-0.0939	-0.1459	-0.2365	-0.206	-0.0986	-0.0348	-0.0321
-0.0321	-0.0313	0.0304	0.2254	0.3414	0.3344	0.229	0.1364	0.016	-0.034	-0.0401	-0.0463	-0.0504	-0.1192	-0.2398	-0.2244	-0.1479	-0.042	-0.0321
far right, marginal pixel 1
0.0012	0.0003	-0.0204	-0.0645	-0.1007	-0.098	-0.0786	-0.0858	-0.0776	-0.0658	-0.0534	-0.0204	0.042	0.312	0.6642	0.6886	0.4369	0.044	0.0012
0.001	0.0007	-0.0108	-0.0766	-0.1208	-0.123	-0.1086	-0.1032	-0.0926	-0.0791	-0.0782	-0.0578	0.0143	0.2652	0.6526	0.7175	0.3636	0.0198	0.001
0.0009	0.0009	-0.0046	-0.0704	-0.1405	-0.1164	-0.1032	-0.0942	-0.0799	-0.0652	-0.0837	-0.0862	-0.0216	0.0939	0.2785	0.2771	0.1033	0.0053	0.0009
0.0009	0.0009	-0.0029	-0.0568	-0.118	-0.0854	-0.0663	-0.0588	-0.062	-0.0558	-0.068	-0.0589	-0.0285	0.0393	0.1066	0.0755	0.0215	0.0016	0.0009
0.0009	0.0009	0.0001	-0.0218	-0.0821	-0.0481	-0.02	-0.0204	-0.034	-0.0478	-0.0403	-0.0216	-0.0113	0.0105	0.056	0.0163	0.0021	0.001	0.0009
maginal angle (curve)
0.005	0.0036	-0.0386	-0.2902	-0.5622	-0.4709	-0.3767	-0.3625	-0.3461	-0.3136	-0.3236	-0.2449	-0.0051	0.7209	1.7578	1.7749	0.9275	0.0717	0.005
marginal radius (curve)
1.5251	1.1852	-0.1052	-0.4142	-0.2589
Figure 3D bottom, mean retinotopy						Figure 3E									Figure 3F, average distribution of pixel's preferred angles [counts]
experienced			navie			left, correlation pretectum			middle, correlation tectal neuopil			right, correlation tectal PVN			left, L pretectum			middle left, R pretecum			middle right, L tectal neuropil			right, R tectal neuropil
mean L [deg]	mean R [deg]		mean L [deg]	mean R [deg]		experienced	naive		experienced	naive		experienced	naive		experienced	naive		experienced	naive		experienced	naive		experienced	naive
-215.989	260.5171		189.628	222.4967		0.0141	0.0226		0.0133	0.0105		-0.0024	0.0003		5	15		14	21		309	292		348	232
-207.9158	244.3291		167.1869	207.7967		0.0367	0.0464		0.0109	0.0331		-0.0038	0.0002		4	12		6	12		318	376		312	349
-199.8564	228.1442		144.7507	193.1292		0.079	0.0952		0.044	0.0423		0.003	0.004		6	9		43	8		248	307		381	288
-191.8135	211.9636		122.321	178.5007		0.0019	-0.015		0.0043	-0.0077		0.0035	-0.0072		6	7		4	21		91	196		78	243
-183.7905	195.7897		99.9001	163.9196		0.0246	0.0243		0.0188	0.004		0.0058	-0.0048		11	14		19	9		387	343		376	286
-175.7915	179.6256		77.4913	149.3967		0.042	0.0886		0.0117	0.0413		0.0034	0.0001		9	4		8	1		238	176		286	206
-167.8222	163.4766		55.1001	134.9466		0.1384	0.0962		0.0394	0.0284		0.0026	0		2	8		1	17		229	222		231	264
-159.8902	147.3515		32.7351	120.5889		0.0017	0.0551		0.0011	0.011		0.0003	0.0002		2	6		5	4		74	110		79	152
-152.0055	131.2657		10.4122	106.3508		0.1029	0.1346		0.0284	0.0464		0.0065	0.0089		14	9		0	7		284	185		213	130
-144.1824	115.2474		-11.8381	92.2715		0.0562	0.2433		0.0148	0.0773		-0.0007	0.0185		7	8		6	0		268	340		306	196
-136.4415	99.3529		-33.9489	78.409		0.0392	0.0821		0.0177	0.046		-0.0047	0.0036		27	23		8	0		242	327		305	258
-128.8135	83.7047		-55.748	64.8525		0.1509	0.0586		0.0219	0.0364		0.0062	-0.0002		15	15		10	7		182	223		274	183
-121.3462	68.6062		-76.862	51.7468		0.0947	0.0146		0.0718	0.0003		0.0076	0.0024		0	26		8	18		249	252		322	246
-114.1181	54.9507		-97.135	39.3411		0.1661	0.0175		0.046	0.0131		0.0171	-0.0001		8	22		4	8		251	311		204	179
-107.2671	45.1634		-108.1617	28.0959		0.0935	0.0484		0.0551	0.0217		0.0073	-0.0004		26	19		11	17		314	242		332	317
-101.0561	41.0952		-111.3131	18.9263		0.0825	0.06		0.0551	0.0433		0.0149	0.0198		15	12		7	21		226	159		164	347
-96.038	44.2334		-111.7172	12.6404		0.1728	0.0282		0.0458	0.0246		0.0075	0.0018		6	10		9	27		245	338		187	280
-92.8727	30.7719		-110.6174	7.5538		0.0117			0.0227			-0.0024			31			32			321			257
-90.9091	10.8942		-99.8113	16.411		0.0677			0.0814			0.0107			42			16			399			232
-92.613	11.9696		-96.1451	21.8573		0.0279			0.0257			-0.0009			4			12			287			260
-95.0125	16.6912		-102.5725	22.8543		0.1213			0.0378			0.0045			8			8			372			305
-89.4193	17.9736		-109.1739	22.6466		0.0478			0.0523			0.0052			14			4			137			108
-73.2797	22.723		-107.0251	22.1103		0.0176			0.0451			0.0071			26			17			315			314
-69.2467	23.9282		-107.6884	19.2999
-87.6034	28.6164		-109.0932	21.4177
-103.29	34.4471		-107.0109	23.1616
-100.2438	35.6476		-105.4825	24.2409
-99.48	30.4368		-103.1663	23.044
-102.6323	32.1389		-101.5964	27.8635
-106.4612	31.7923		-102.3028	27.2664
-107.3309	35.109		-99.4714	31.6802
-105.1603	38.1682		-87.3389	34.4654
-101.9394	41.3853		-82.437	38.6071
-96.2421	41.0005		-90.4935	41.5088
-91.1196	44.8107		-97.3835	47.5821
-72.9698	47.6168		-96.1018	50.1194
-65.2884	50.6187		-98.6933	53.8213
-74.2802	57.5673		-102.0156	60.3885
-90.0214	65.6329		-100.1574	68.0181
-93.2838	68.3055		-96.3999	69.5066
-94.2738	71.0721		-96.6277	65.3987
-97.6828	71.6273		-98.2286	62.6406
-95.3221	72.3184		-98.7371	64.1212
-94.506	72.4229		-96.0141	67.233
-95.0169	78.0481		-93.181	65.8338
-96.2111	84.8995		-84.731	66.5576
-92.3317	91.1515		-77.1355	70.5507
-88.5568	94.0081		-75.0622	75.1078
-86.2523	97.4172		-80	80.3499
-85.0679	96.3523		-73.7456	82.6308
-81.1618	95.1828		-70.2529	82.7877
-78.3586	96.46		-72.9661	84.0211
-77.845	100.2433		-76.4466	91.3758
-77.5645	99.295		-70.9167	97.9024
-75.3441	99.2207		-69.0909	102.1071
-72.2968	100.9569		-57.5479	103.0943
-72.6853	102.8134		-46.7964	101.5078
-70.8524	103.2332		-44.9603	103.0834
-69.4654	103.3615		-50.9091	104.063
-65.6718	104.3073		-47.8492	106.132
-64.7862	107.3601		-44.2929	106.608
-63.8068	109.5258		-40.404	110.1544
-59.3144	109.4406		-36.5152	112.6852
-56.3502	108.8575		-32.6263	107.7037
-51.5246	109.8477		-28.7374	101.8983
-48.3316	108.8748		-36.0262	102.5607
-42.7612	110.2569		-41.0862	112.5146
-47.0276	109.0095		-29.0909	118.9766
-45.6468	103.7631		-15.7075	118.5758
-40.7935	102.4047		-13.0067	100.6891
-35.066	108.9928		-21.3159	90.8636
-37.0131	111.9426		-21.6263	97.1217
-44.6643	110.214		-21.7851	103.1006
-44.476	110.9295		-14.0173	95.862
-41.2744	110.9784		-16.5523	95.6056
-38.9474	109.272		-11.1378	97.2631
-44.305	103.6212		-15.5491	100.4798
-47.6603	89.2382		-23.9108	104.406
-52.0896	73.2313		-33.0276	108.6496
-52.9689	55.9014		-23.5608	113.0585
-32.6372	37.9696		-13.9517	117.5631
-15.7523	19.7684		-3.6619	122.1276
-16.8946	1.4269		7.1636	126.7319
-36.8521	-16.9957		18.2974	131.3638
-39.3193	-35.4692		29.6202	136.0157
-40.6021	-53.9764		41.0658	140.6824
-39.587	-72.507		52.5954	145.3604
-36.9926	-91.0546		64.1848	150.0472
-33.5293	-109.6148		75.8181	154.741
-29.5468	-128.1846		87.4846	159.4404
-25.2318	-146.7618		99.1768	164.1445
-20.6919	-165.345		110.8893	168.8523
-15.9934	-183.9329		122.6181	173.5634
-11.1788	-202.5248		134.3601	178.2771
-6.277	-221.1199		146.1131	182.9932
-1.3079	-239.7177		157.8752	187.7112
