# Supplementary material for: Experience, circuit dynamics, and forebrain recruitment in larval zebrafish prey capture
Source: eLife. 2020 Sep 28;9:e56619. doi: 10.7554/eLife.56619 (PMC7561350; doi:10.7554/eLife.56619)
Supplement: Figure 4—figure supplement 1—source data 1. [file elife-56619-fig4-figsupp1-data1.csv]

Figure 4, figure supplement 1
Figure4, figure supplement 1A, pairwise covariance in visual areas
spontaneous		experienced								naive
	regions	1	2	3	4	5	6		regions	1	2	3	4	5	6
	1	0	0.1344	0.3859	0.2009	0.3154	0.2011		1	0	0.1679	0.4153	0.2064	0.3164	0.214
	2	0.1344	0	0.2094	0.4024	0.2224	0.3542		2	0.1679	0	0.2301	0.438	0.2332	0.3448
	3	0.3859	0.2094	0	0.4067	0.6403	0.469		3	0.4153	0.2301	0	0.4031	0.6218	0.4405
	4	0.2009	0.4024	0.4067	0	0.4725	0.6662		4	0.2064	0.438	0.4031	0	0.4545	0.652
	5	0.3154	0.2224	0.6403	0.4725	0	0.562		5	0.3164	0.2332	0.6218	0.4545	0	0.5329
	6	0.2011	0.3542	0.469	0.6662	0.562	0		6	0.214	0.3448	0.4405	0.652	0.5329	0
evoked	regions	1	2	3	4	5	6		regions	1	2	3	4	5	6
	1	0	0.1058	0.4426	0.0556	0.3251	0.1291		1	0	0.1058	0.42	0.0511	0.3344	0.1369
	2	0.1058	0	0.0572	0.447	0.13	0.3573		2	0.1058	0	0.0649	0.4599	0.1519	0.3671
	3	0.4426	0.0572	0	0.1533	0.6482	0.299		3	0.42	0.0649	0	0.1315	0.6528	0.2708
	4	0.0556	0.447	0.1533	0	0.3006	0.6776		4	0.0511	0.4599	0.1315	0	0.2927	0.67
	5	0.3251	0.13	0.6482	0.3006	0	0.4564		5	0.3344	0.1519	0.6528	0.2927	0	0.4493
	6	0.1291	0.3573	0.299	0.6776	0.4564	0		6	0.1369	0.3671	0.2708	0.67	0.4493	0
