# Supplementary material for: Experience, circuit dynamics, and forebrain recruitment in larval zebrafish prey capture
Source: eLife. 2020 Sep 28;9:e56619. doi: 10.7554/eLife.56619 (PMC7561350; doi:10.7554/eLife.56619)
Supplement: Figure 4—source data 1. [file elife-56619-fig4-data1.csv]

Figure 4
Figure 4 B
connectiviy values	experienced	1	2	3	4	5	6		naive	1	2	3	4	5	6
spontaneous	1	0	0.13	0.39	0.2	0.32	0.2	spontaneous	1	0	0.17	0.42	0.21	0.32	0.21
	2	0.13	0	0.21	0.4	0.22	0.35		2	0.17	0	0.23	0.44	0.23	0.34
	3	0.39	0.21	0	0.41	0.64	0.47		3	0.42	0.23	0	0.4	0.62	0.44
	4	0.2	0.4	0.41	0	0.47	0.67		4	0.21	0.44	0.4	0	0.45	0.65
	5	0.32	0.22	0.64	0.47	0	0.56		5	0.32	0.23	0.62	0.45	0	0.53
	6	0.2	0.35	0.47	0.67	0.56	0		6	0.21	0.34	0.44	0.65	0.53	0
evoked	experienced	1	2	3	4	5	6	naive	experienced	1	2	3	4	5	6
	1	0	0.11	0.44	0.06	0.33	0.13		1	0	0.11	0.42	0.05	0.33	0.14
	2	0.11	0	0.06	0.45	0.13	0.36		2	0.11	0	0.06	0.46	0.15	0.37
	3	0.44	0.06	0	0.15	0.65	0.3		3	0.42	0.06	0	0.13	0.65	0.27
	4	0.06	0.45	0.15	0	0.3	0.68		4	0.05	0.46	0.13	0	0.29	0.67
	5	0.33	0.13	0.65	0.3	0	0.46		5	0.33	0.15	0.65	0.29	0	0.45
	6	0.13	0.36	0.3	0.68	0.46	0		6	0.14	0.37	0.27	0.67	0.45	0
