# Supplementary material for: Experience, circuit dynamics, and forebrain recruitment in larval zebrafish prey capture
Source: eLife. 2020 Sep 28;9:e56619. doi: 10.7554/eLife.56619 (PMC7561350; doi:10.7554/eLife.56619)
Supplement: Figure 5—figure supplement 1—source data 1. [file elife-56619-fig5-figsupp1-data1.csv]

Figure 5, figure supplement 1
Figure 5, figure supplement 1A
F statistic connectivity values
right, strongest experienced hunters
regions	1	2	3	4	5	6	7
1	0	15.044	2.657	2.123	2.014	8.354	5.931
2	1.091	0	1.988	0.85	3.25	4.69	2.343
3	0	1.149	0	9.619	14.01	8.027	8.217
4	12.598	1.152	1.173	0	17.931	9.395	3.14
5	20.064	0	6.248	18.104	0	15.506	2.938
6	5.26	8.221	0.945	4.127	17.965	0	33.623
7	15.689	1.624	6.645	16.638	4.179	3.607	0
left, weakest experienced hunters
regions	1	2	3	4	5	6	7
1	0	11.347	0.82	2.034	1.033	3.776	2.65
2	2.675	0	3.405	3.402	0	3.312	0.992
3	0.983	0.998	0	0.841	1.783	0	0
4	16.413	0	1.118	0	10.946	13.359	0
5	18.856	0.889	5.252	10.427	0	13.208	2.314
6	2.766	7.037	1.566	2.582	7.24	0	25.526
7	16.336	0.856	6.405	13.36	2.412	6.359	0
