# Supplementary material for: Experience, circuit dynamics, and forebrain recruitment in larval zebrafish prey capture
Source: eLife. 2020 Sep 28;9:e56619. doi: 10.7554/eLife.56619 (PMC7561350; doi:10.7554/eLife.56619)
Supplement: Figure 5—source data 1. [file elife-56619-fig5-data1.csv]

Figure 5
Figure 5A, connectivity comparison in evoked condition
naive									experienced
region	1	2	3	4	5	6	7		region	1	2	3	4	5	6	7
1	0	9.87	0.5	1.5	1.57	3.27	2.1		1	0	12.45	1.65	1.24	1.81	4.41	3.33
2	3.31	0	1.28	1.56	1.69	2.56	1.65		2	2.9	0	2.23	2.56	2.17	3.67	2.12
3	1.75	1.7	0	4.13	8.46	6.72	7.02		3	1.04	1.06	0	5.01	8.39	5.21	4.2
4	8.66	2	1.35	0	14.46	8.86	2.48		4	12.85	0.23	1.79	0	14.52	10.42	1.81
5	10.86	1.87	2.58	11.6	0	10.66	2.9		5	17.26	0.6	4.63	13.71	0	13.88	3.45
6	7.25	11.37	0.48	2.95	11.98	0	34.57		6	4.85	7.27	1.79	2.99	10.96	0	29.85
7	8.95	4.11	2.83	11.87	5.09	5.18	0		7	13.04	1.04	5.19	12.68	2.92	6.58	0
Figure 5C
eye convergence frequency vs Granger causality links
i)					ii)					ii)					iv)					iv)
tectal PVN vs telencephalon					pretectum vs tectal neuropil					pretectum vs tectal PVN					pretectum vs cerebellum					pretectum vs hindbrain
par conv freq	par GC	fla conv freq	fla GC		par conv freq	par GC	fla conv freq	fla GC		par conv freq	par GC	fla conv freq	fla GC		par conv freq	par GC	fla conv freq	fla GC		par conv freq	par GC	fla conv freq	fla GC
0	19.7472	0.0864	14.1374	1	0	2.7217	0.0864	3.3129		0	4.1363	0.0864	7.3057		0	2.3089	0.0864			0	1.872	0.0864	2.0915
0.9504	26.9889	0.1728	8.5887	2	0.9504	10.9868	0.1728	5.6152		0.9504	10.4699	0.1728	10.4408		0.9504	3.5727	0.1728	4.4889		0.9504	6.0428	0.1728	6.5623
0.864	27.6341	0.0864	17.4452	3	0.864	11.0353	0.0864	6.1205		0.864	20.9053	0.0864	9.377		0.864	12.1712	0.0864	2.8724		0.864	9.3358	0.0864	4.3909
0.432	23.2199	-0.144	8.9497	4	0.432	6.1464	-0.144	2.7588		0.432	6.3214	-0.144	2.1844		0.432	2.3586	-0.144	3.0006		0.432	3.4136	-0.144	2.1485
0.3456	30.3845	0.0864	9.0256	5	0.3456	12.2108	0.0864	6.0931		0.3456	11.7982	0.0864	4.3975		0.3456	14.1688	0.0864	3.6953		0.3456	6.2097	0.0864	3.8031
0.4608	25.668	0.2592	11.3934	6	0.4608	9.6893	0.2592	2.3197		0.4608	6.6839	0.2592	3.0195		0.4608	6.5995	0.2592	10.3244		0.4608	2.1286	0.2592	2.5133
0.1152	14.1911	0.3456	11.6591	7	0.1152	4.0916	0.3456	3.3259		0.1152	2.1422	0.3456	8.9017		0.1152	7.058	0.3456	2.5335		0.1152	2.7466	0.3456	21.3383
0.0288	18.0578	0.3168	17.9396	8	0.0288	2.0011	0.3168	10.3163		0.0288	3.1654	0.3168	12.9563		0.0288	2.9752	0.3168	13.065		0.0288	2.3231	0.3168	18.7303
0.5184	11.572	0.2016	1.6269	9	0.5184	6.4328	0.2016	3.806		0.5184	12.9115	0.2016	16.312		0.5184	3.6552	0.2016	13.4379		0.5184	2.8641	0.2016	14.9703
-0.2016	18.7831	0	11.8228	10	-0.2016	2.6394	0	2.8514		-0.2016	2.3609	0	5.2633		-0.2016	2.8672	0	20.2713		-0.2016	2.0083	0	4.0572
0.3744	11.2259	0.432	7.936	11	0.3744	1.569	0.432	4.852		0.3744	3.0594	0.432	13.6582		0.3744	5.6102	0.432	4.7357		0.3744	2.6881	0.432	13.4423
0.3744	15.986	0.72	5.9121	12	0.3744	4.1169	0.72	9.7172		0.3744	10.3179	0.72	17.1551		0.3744	5.6849	0.72	14.0364		0.3744	10.1014	0.72	32.2231
1.0368	22.8947	0.3744	3.7482	13	1.0368	8.8776	0.3744	6.8769		1.0368	13.6634	0.3744	6.3721		1.0368	7.1786	0.3744	33.321		1.0368	13.8955	0.3744	4.1397
0.9504	9.6746	0	8.9031	14	0.9504	6.1668	0	6.1542		0.9504	11.3122	0	5.7658		0.9504	4.3371	0	4.8531		0.9504	3.7959	0	2.0836
0.0288	20.2432	-0.4608	16.7988	15	0.0288	2.8108	-0.4608	11.9949		0.0288	4.7768	-0.4608	16.6469		0.0288	2.0985	-0.4608	2.5489		0.0288	2.3953	-0.4608	13.448
0.8352	22.6366			16	0.8352	4.1582				0.8352	7.2864				0.8352	8.3082		9.2142		0.8352	5.3447
0.0864	4.6035			17	0.0864	4.2104				0.0864	6.68				0.0864	2.6677				0.0864	1.6719
-0.144	17.4504			18	-0.144	4.2043				-0.144	3.4276				-0.144	3.7491				-0.144	2.6677
1.152	13.1283			19	1.152	11.0286				1.152	13.6987				1.152	16.4467				1.152	11.8098
