# Supplementary material for: Experience, circuit dynamics, and forebrain recruitment in larval zebrafish prey capture
Source: eLife. 2020 Sep 28;9:e56619. doi: 10.7554/eLife.56619 (PMC7561350; doi:10.7554/eLife.56619)
Supplement: Figure 6—source data 1. [file elife-56619-fig6-data1.csv]

Figure 6A
Example pretectum + convergence and pretectum only traces for one experienced and one naive example fish
experienced, left
pretectum + convergence
	frame number
mean [Fz] region	1	2	3	4	5	6	7	8	9	10	11	12	13	14	15	16	17	18	19	20	21	22	23	24	25	26	27	28	29	30	31	32	33	34	35	36	37	38	39	40	41	42	43	44	45	46	47	48	49
telencephalon	-0.0278	-0.051	-0.0641	-0.0337	-0.0092	-0.0038	0.0209	0.062	0.0212	0.0368	-0.017	-0.0243	0.0046	0.0406	0.0238	0.007	0.0291	0.0388	0.0115	-0.0074	-0.0067	-0.0054	-0.0332	-0.0204	0.0079	0.0025	0.0337	0.05	0.0255	0.1031	0.1088	0.133	0.1249	0.1528	0.1813	0.2074	0.1865	0.1628	0.1658	0.1623	0.1475	0.1365	0.1172	0.1162	0.0843	0.0884	0.1273	0.1753	0.1379
habenula	-0.0651	0.08	0.0516	0.0142	0.0042	-0.0079	0.0247	0.0222	-0.0125	-0.0549	-0.0522	-0.0476	-0.0295	0.0399	0.0297	-0.0387	0.029	0.0673	0.0619	0.0075	-0.0404	-0.0296	-0.0257	0.0405	-0.0687	-0.0249	0.0251	0.0254	-0.0074	0.0965	0.1847	0.1674	0.1713	0.2381	0.1799	0.1838	0.1939	0.1823	0.124	0.134	0.0874	0.0471	0.1029	0.116	0.0721	0.0907	0.1075	0.1343	0.1476
pretectum (contra)	-0.023	-0.0541	-0.0252	-0.0713	-0.0061	-0.0227	0.0195	-0.0277	-0.0847	-0.0481	0.0042	0.0118	0.0994	0.1005	0.049	0.037	-0.0046	0.0069	0.0115	-0.0396	0.0072	-0.0117	0.0039	0.0478	0.02	0.1407	0.2449	0.2456	0.3298	0.8033	0.9202	0.9859	0.9851	1.0624	0.9342	0.8901	0.7377	0.6471	0.5586	0.5218	0.4169	0.357	0.3681	0.3108	0.3029	0.288	0.2548	0.2429	0.2499
tectal neuopil (contra)	-0.0152	-0.0081	0.0068	-0.0067	0.0019	-0.0186	-0.0034	-0.0158	-0.0252	-0.0258	-0.0232	-0.0079	-0.0034	0.0001	-0.0045	0.0011	0.0217	0.0349	-0.0013	-0.0145	0.014	0.0155	0.008	0.0424	0.0273	0.0647	0.058	0.0536	0.0632	0.1314	0.1505	0.1399	0.1419	0.1337	0.108	0.0927	0.058	0.0411	0.036	0.0323	0.0234	0.0229	0.0247	0.0225	0.012	0.0114	0.0068	0.0127	0.0118
tectal PVN (contra)	-0.0133	0.0086	0.0218	0.0159	-0.0003	-0.0071	0.0227	0.0394	-0.0069	0.0306	-0.0083	-0.0147	-0.0075	0.0219	0.0102	-0.0041	0.0327	-0.0006	-0.0376	-0.046	-0.0444	0.0171	-0.036	0.029	-0.0231	0.0188	0.0213	-0.001	-0.0103	0.0266	0.0532	0.0675	0.0549	0.1034	0.061	0.0607	0.0561	0.0422	0.0123	0.0477	0.0254	0.0117	-0.0034	0.0138	0.0456	0.0095	0.017	0.037	0.0038
cerebellum	-0.0195	-0.0699	-0.0469	-0.1073	0.0886	0.1717	0.1135	0.1057	0.0198	0.0222	-0.0524	-0.023	0.047	0.1615	0.0316	-0.1041	-0.072	0.049	-0.1672	-0.151	-0.0856	0.0666	-0.018	0.093	-0.0533	0.1558	0.3003	0.1389	0.1763	0.806	1.7003	1.8573	1.7048	1.6217	1.5305	1.1515	0.8206	0.6244	0.3304	0.3293	0.1802	0.2058	0.112	0.1632	0.1899	0.0273	0.0887	0.0981	0.0324
hindbrain	0.0003	0.031	0.009	-0.0147	0.0318	0.0141	0.0242	0.0422	-0.0004	-0.0123	0.0073	-0.0169	0.0077	0.0219	0.0054	-0.0178	0.0034	0.0119	-0.0154	-0.0456	-0.0503	-0.0145	-0.0243	0.0307	-0.0285	0.0281	0.0332	0.0225	0.0115	0.0517	0.1349	0.1801	0.2044	0.1894	0.1918	0.1843	0.1387	0.1089	0.0753	0.105	0.0835	0.1115	0.0578	0.0567	0.0592	0.0595	0.0409	0.044	0.0038
pretectum only	1	2	3	4	5	6	7	8	9	10	11	12	13	14	15	16	17	18	19	20	21	22	23	24	25	26	27	28	29	30	31	32	33	34	35	36	37	38	39	40	41	42	43	44	45	46	47	48	49
telencephalon	0.0099	0.0397	0.0271	0.0145	-0.0239	-0.0163	-0.039	-0.0594	-0.0797	-0.0699	-0.0566	-0.0383	-0.0238	-0.0541	-0.0155	-0.0132	0.044	0.0438	0.0353	0.0668	0.0612	0.0603	0.0366	0.0215	0.029	0.0166	-0.0219	-0.028	-0.0195	-0.0372	-0.0213	-0.0155	-0.0014	-0.0071	0.0102	0.018	0.0127	-0.009	-0.0389	-0.0581	-0.0468	-0.0382	-0.0419	-0.0554	-0.0224	-0.058	-0.0554	-0.0702	-0.0946
habenula	0.0018	0.0258	0.028	0.0321	0.0121	0.0068	-0.0398	-0.045	-0.0347	-0.0553	-0.0387	-0.0172	-0.0486	-0.0559	-0.0059	-0.0152	-0.0005	0.005	0.0354	0.0435	0.019	0.0391	0.0565	-0.0008	0.0524	0.0172	-0.0161	-0.0247	0.0355	-0.0277	-0.0231	0.0351	-0.0226	-0.0198	-0.0317	-0.0009	-0.0089	-0.0054	-0.0575	-0.0514	-0.0604	-0.0585	-0.0568	-0.0214	-0.0752	-0.0862	-0.0184	-0.0359	-0.0278
pretectum (contra)	0.0374	0.039	-0.009	-0.0444	-0.026	-0.0138	-0.0115	-0.0231	-0.0091	-0.0432	0.0349	0.0116	0.0208	-0.0015	0.0397	0.0229	0.0559	0.0337	-0.0027	0.0015	-0.0136	-0.0459	-0.0352	-0.0296	0.011	0.0384	-0.0014	0.0861	0.2666	0.5696	0.8059	0.5836	0.4935	0.3515	0.3082	0.1959	0.1187	0.1026	0.0476	0.0113	0.0294	0.0585	0.0373	0.0723	0.0664	0.1001	0.071	0.124	0.0506
tectal neuopil (contra)	-0.001	0.0043	-0.0214	0.002	-0.0071	-0.0029	0.0069	0.0069	0.0068	-0.0083	0.0142	0.0037	0.0127	0.0098	0.0095	-0.002	-0.0026	-0.0154	0.0001	0.0088	0.0051	-0.0123	-0.0068	-0.0094	-0.0018	-0.0134	0.0062	0.0181	0.0369	0.079	0.0687	0.068	0.0606	0.05	0.0311	0.033	0.0127	0.0298	0.0098	0.005	0.0056	0.0229	0.0019	0.0022	0.0006	-0.007	0.0153	0.0126	-0.0098
tectal PVN (contra)	0.0214	0.0221	-0.0177	0.0167	-0.0193	0.011	0.0063	-0.0053	-0.0058	-0.0198	-0.0128	0	0.0108	-0.005	-0.0026	-0.0015	0.0077	-0.0009	0.002	0.0235	-0.0085	-0.0003	-0.0001	-0.0164	-0.0055	0.0022	0.0005	0.0076	0.0026	0.0442	0.0108	0.0285	0.0381	0.0292	0.02	0.015	0.0107	0.0136	-0.0023	-0.0016	-0.0103	0.0035	-0.0005	-0.0153	0.0062	-0.0189	0.0095	0.0113	-0.0205
cerebellum	0.1374	0.2264	0.0734	0.0181	0.0013	0.0491	-0.0035	-0.0483	-0.0084	-0.1359	-0.0672	-0.0499	0.0169	-0.0735	-0.0244	0.047	0.0427	0.0781	0.0231	0.0501	-0.0008	-0.035	-0.108	-0.177	-0.0319	-0.0812	-0.1048	-0.0401	0.1805	0.251	0.2289	0.1519	0.0405	0.0249	-0.0061	-0.0521	-0.1101	-0.096	-0.181	-0.13	-0.0902	0.0616	0.078	0.1018	0.1037	-0.0305	0.0293	0.1139	0.0288
hindbrain	0.0367	0.0463	-0.0201	0.0236	-0.005	-0.0044	-0.0023	-0.0136	-0.0118	-0.0216	-0.0092	0.0034	0.0052	-0.0226	-0.0075	-0.0136	0.0101	0.0056	-0.0082	0.0221	0.0087	0.0015	-0.0089	-0.0194	0.0051	-0.0171	-0.0057	0.0054	-0.0075	0.0099	0.0022	0.003	0.0053	0.0032	0.0012	0.0054	-0.014	0.0006	0.0063	-0.0172	-0.0256	-0.0018	-0.0036	-0.0125	-0.0272	-0.031	0.0084	0.005	-0.0092
naive, right
pretectum + convergence
mean [Fz] region	1	2	3	4	5	6	7	8	9	10	11	12	13	14	15	16	17	18	19	20	21	22	23	24	25	26	27	28	29	30	31	32	33	34	35	36	37	38	39	40	41	42	43	44	45	46	47	48	49
telencephalon	-0.05512	0.06894	0.05406	0.06881	-0.0124	0.01477	0.00036	0.01488	0.01793	0.01702	-0.00211	0.04508	0.04562	0.0365	0.01885	0.01268	-0.04684	-0.01797	-0.00111	-0.0164	-0.02977	-0.02357	-0.16079	-0.0515	0.00209	0.01501	-0.00928	0.00507	0.1293	0.07551	0.08033	0.0647	0.06287	0.09661	0.12251	0.10392	0.13605	0.13038	0.1004	0.14199	0.10591	0.06769	0.07862	0.06972	0.0701	0.13527	0.10143	0.13111	0.15924
habenula	0.05694	0.0289	0.0451	0.02493	-0.03748	-0.03891	-0.00513	-0.04323	0.04856	-0.01378	-0.03356	0.02751	0.03663	-0.00248	0.01939	-0.00476	-0.01828	-0.01252	-0.0012	0.00587	0.00424	-0.03813	-0.04896	-0.00354	0.00387	0.09324	0.08517	0.07621	0.19232	0.08684	0.13374	0.12131	0.10336	0.1069	0.11402	0.09511	0.1324	0.12751	0.12392	0.17896	0.13813	0.08859	0.06056	0.07814	0.092	0.13645	0.09086	0.12203	0.10839
pretectum (contra)	0.00991	0.08077	0.04431	-0.04044	-0.04676	-0.11183	-0.06652	-0.11639	-0.09967	-0.09829	-0.02133	0.02912	-0.01157	0.01737	0.01983	0.02022	0.02092	0.0271	0.03036	-0.00766	-0.01835	-0.0156	0.03466	0.10164	0.21818	0.43831	0.60795	0.94371	1.35024	1.55182	1.46588	1.39973	1.16999	1.14382	0.96116	0.83088	0.71889	0.65231	0.51004	0.43695	0.41426	0.38261	0.38868	0.42168	0.3908	0.39382	0.36507	0.35211	0.32117
tectal neuopil (contra)	0.00681	-0.01192	-0.00097	-0.01781	0.00605	-0.02679	-0.01842	-0.03328	-0.02127	-0.00917	0.00127	0.01081	0.02319	0.01783	0.019	0.02176	0.0053	0.00947	0.00656	-0.01259	-0.00437	-0.02489	0.0074	0.00294	0.0431	0.09649	0.15143	0.173	0.21198	0.23158	0.18306	0.16446	0.13233	0.1404	0.11599	0.07956	0.0581	0.05047	0.02546	0.01727	0.00614	-0.01593	-0.00456	-0.00112	0.00112	-0.00952	-0.00799	-0.00397	-0.03426
tectal PVN (contra)	0.04626	0.00634	0.03311	0.01528	0.02587	-0.03176	-0.02921	-0.03617	-0.03615	-0.03238	-0.02925	-0.0235	0.01272	-0.00622	-0.00267	-0.01181	0.0314	0.00699	0.02999	0.00617	0.01507	-0.00675	0.00624	-0.02244	0.03287	0.05656	0.0987	0.10452	0.16109	0.17101	0.17927	0.18296	0.17764	0.18162	0.14728	0.15493	0.16506	0.14393	0.08495	0.09523	0.09048	0.09845	0.11226	0.09748	0.08571	0.10001	0.07974	0.09746	0.05616
cerebellum	0.61297	0.48286	0.54086	0.27556	0.17361	-0.07485	-0.11537	-0.25967	-0.30874	-0.13626	-0.10904	-0.14719	-0.14274	-0.06602	0.01724	-0.15494	-0.16944	-0.30025	-0.27178	-0.19597	-0.17594	-0.0281	0.06656	0.09861	0.38805	1.1722	1.48302	1.51176	2.34701	3.07737	3.38687	3.57748	3.21584	2.92324	2.60644	2.4603	2.3351	2.20743	1.78629	1.73362	1.93277	1.68254	1.45472	1.43834	1.53054	1.49549	1.47495	1.36996	1.17626
hindbrain	0.09079	0.06137	0.07184	0.04623	0.02966	-0.02272	-0.02039	-0.05143	-0.04649	-0.03855	-0.04939	0.00244	-0.0031	-0.0267	-0.01299	-0.01402	-0.02599	-0.01671	-0.03022	-0.02464	-0.00277	-0.0079	0.0219	0.0122	0.05757	0.14416	0.18381	0.14259	0.25095	0.34543	0.37332	0.42432	0.36224	0.37519	0.3573	0.35717	0.37485	0.3256	0.27014	0.31863	0.28917	0.29605	0.25703	0.2576	0.25673	0.24721	0.25536	0.24309	0.18677
pretectum only
mean [Fz] region	1	2	3	4	5	6	7	8	9	10	11	12	13	14	15	16	17	18	19	20	21	22	23	24	25	26	27	28	29	30	31	32	33	34	35	36	37	38	39	40	41	42	43	44	45	46	47	48	49
telencephalon	0.08593	0.0613	0.06443	-0.00464	-0.0182	0.00476	-0.0856	-0.02764	-0.01464	0.03413	-0.03298	0.01268	0.01586	0.01634	0.02324	-0.03857	-0.05917	-0.00252	0.03657	-0.07105	-0.07271	0.00478	0.03056	0.02932	0.00781	-0.00714	0.06087	0.09527	0.09312	0.02739	0.01877	0.10129	0.04753	0.05106	0.06626	0.09952	0.12709	0.12343	0.07011	0.15473	0.16926	0.19268	0.14821	0.23334	0.19938	0.16723	0.12646	-0.0008	0.03683
habenula	0.05284	0.04796	0.0516	0.03812	-0.0445	-0.05755	-0.04411	0.00138	-0.049	0.04429	-0.06094	0.0498	0.03482	0.01138	-0.00252	-0.06282	0.03566	-0.01284	0.05015	0.02047	-0.08588	-0.05059	0.03587	0.02558	-0.02917	0.06756	0.14809	0.20534	0.17473	0.09531	0.183	0.18409	0.15983	0.17712	0.17533	0.20911	0.22563	0.20407	0.10712	0.20247	0.15042	0.1633	0.14072	0.19716	0.27596	0.19591	0.15956	0.1506	0.05843
pretectum (contra)	-0.02461	-0.02221	0.01123	0.00512	-0.06191	-0.02142	-0.05125	-0.01796	-0.00999	0.01173	-0.03474	0.03456	0.0245	-0.03244	-0.00305	-0.01386	-0.033	-0.02234	0.01222	0.01739	0.01331	-0.00691	0.01685	0.07281	0.13595	0.26867	0.25917	0.29666	0.51303	0.75142	1.03344	0.8398	0.68468	0.60075	0.53709	0.49667	0.42556	0.40537	0.31255	0.34814	0.29835	0.2374	0.27205	0.33987	0.31307	0.31439	0.38378	0.35285	0.29997
tectal neuopil (contra)	-0.00546	-0.00074	-0.00226	-0.00317	-0.01552	-0.01538	-0.02442	-0.02652	-0.00792	-0.00515	-0.01651	0.01122	0.01775	0.00989	0.00466	-0.01068	-0.00949	0.01335	-0.00219	0.00601	-0.0147	-0.00287	0.00876	0.03309	0.05825	0.05143	0.04293	0.0889	0.13149	0.17595	0.18963	0.15661	0.11298	0.08936	0.05735	0.04108	0.05508	0.05671	0.04508	0.04244	0.03764	0.03652	0.03259	0.05633	0.05381	0.0285	0.03397	0.02556	0.01827
tectal PVN (contra)	0.00513	-0.00074	0.00015	0.01368	0.00558	-0.00172	-0.02731	-0.01593	0.00154	-0.00138	-0.0274	-0.00475	0.01365	-0.03305	-0.01515	0.00335	0.01764	0.03458	0.02959	0.01355	-0.03337	-0.0239	-0.00879	0.0312	0.02387	0.04069	0.02509	0.0454	0.08818	0.07868	0.10114	0.09774	0.07654	0.07334	0.06052	0.02855	0.07312	0.07006	0.05231	0.07341	0.0748	0.06135	0.03396	0.09271	0.07525	0.05071	0.04853	0.02416	0.04112
cerebellum	-0.32512	-0.21764	-0.12876	-0.19848	-0.24304	-0.27268	-0.29191	-0.3157	-0.07398	-0.12961	-0.19447	-0.0888	-0.06029	-0.23168	-0.06357	0.02064	0.05793	0.17775	0.30084	0.31115	0.24123	0.32161	0.35668	0.36788	0.68003	0.62163	0.64664	0.72006	0.73541	0.8153	0.9006	0.74532	0.46767	0.36954	0.1672	0.4211	0.53347	0.42039	0.31863	0.19647	0.09858	0.03172	-0.04403	0.33231	0.28563	0.1929	0.19678	0.29269	0.24967
hindbrain	-0.05609	-0.02685	-0.02972	-0.01012	-0.00427	-0.03065	-0.0379	-0.02898	-0.00664	-0.00425	-0.04771	-0.00238	0.00164	-0.03466	-0.03358	-0.01076	0.01945	0.03424	0.04567	0.04669	0.007	0.02786	0.04103	0.05376	0.0872	0.06756	0.06849	0.11031	0.1323	0.13142	0.12854	0.11319	0.07793	0.0623	0.02555	0.08902	0.0799	0.06475	0.04604	0.03199	0.03743	0.02382	-0.00009	0.07039	0.0696	0.03889	0.04014	0.04551	0.03994
Figure 6D, probablility of pretectum transients to result in eye convergence, difference with-without prey						Figure 6E, telencephalon pretectum + convergence vs pretectum only integral							Figure 6F, habenula pretectum + convergence vs pretectum only integral
experienced	naive					eperienced	naive						experienced	naive
0.1507	0					0.7502	0.5819						0.7502	0.5819
0.2371	0.0801					0.7593	-0.2947						0.7593	-0.2947
0.1875	0.0123					-0.3595	0.5815						-0.3595	0.5815
0.1049	-0.0769					-0.1738	0.0438						-0.1738	0.0438
0.0909	0.02					0.0996	-0.6974						0.0996	-0.6974
0.0862	0					0.9716	-1.3558						0.9716	-1.3558
0.0588	0.1143					1.8469	-0.9295						1.8469	-0.9295
0.0238	0.0519					1.7293							1.7293
0.1299	0.0055					1.7232							1.7232
-0.0286	0					3.0574							3.0574
0.0842	-0.0069					0.6914							0.6914
0.0584	0.1537					1.3368							1.3368
0.25	0.0854					1.8762							1.8762
0.1435	0
-0.03	0.0278
0.075
0.0179
-0.0731
0.1596
Figure 6
Figure 6D raw, probability of pretectum transients resul in eye convergence
experienced		naïve
spon	evok	spon	evok
0.067	0.217	0	0
0.081	0.318	0.071	0.152
0	0.188	0.143	0.155
0.103	0.208	0.077	0
0	0.091	0	0.02
0.036	0.122	0	0
0	0.059	0	0.114
0	0.024	0.19	0.242
0.115	0.245	0.071	0.077
0.029	0	0	0
0.034	0.119	0.207	0.2
0.026	0.085	0.138	0.292
0	0.25	0.032	0.118
0.091	0.234	0	0
0.05	0.02	0.25	0.278
0.225	0.3
0	0.018
0.143	0.07
0.154	0.313
[truncated: 12 more columns]
