# Supplementary material for: Experience, circuit dynamics, and forebrain recruitment in larval zebrafish prey capture
Source: eLife. 2020 Sep 28;9:e56619. doi: 10.7554/eLife.56619 (PMC7561350; doi:10.7554/eLife.56619)
Supplement: Figure 7—figure supplement 1—source data 1. [file elife-56619-fig7-figsupp1-data1.csv]

Figure 7, figure supplement 1
Figure7, figure supplement 1 A, paramecia consumption NTR- animals
MTZ [%]						DMSO, [%]
min 1	min 5	min 10	min 15	min 20		min 1	min 5	min 10	min 15	min 20
100	122.58	116.13	116.13	106.45		100	78.95	73.68	68.42	68.42
100	84	70.8	60	40.8		100	95.37	74.07	64.81	37.04
100	100.38	85.38	69.23	55.38		100	100	92	80	68
100	97.73	86.36	68.18	70.45		100	97.59	93.98	86.75	72.29
100	98.48	92.42	81.82	57.58		100	92.96	73.94	50.7	46.48
100	98.16	84.93	77.21	72.79		100	67.07	50	26.83	12.2
100	79.17	91.67	66.67	45.83		100	47.62	16.67	9.52	0
100	95.29	95.29	77.65	52.94		100	148.08	121.15	115.38	88.46
100	64.41	45.76	23.73	23.73		100	109.09	96.36	83.64	54.55
100	82.56	48.84	37.21	30.23		100	92.42	46.97	33.33	3.03
100	72.58	33.87	19.35	9.68		100	77.14	47.14	42.86	34.29
100	66.67	52.08	16.67	12.5		100	95	90	76.67	43.33
100	87.5	69.44	36.11	27.78		100	97.22	91.67	58.33	63.89
100	100	95.83	83.33	58.33		100	56.06	45.45	18.18	12.12
100	98.68	82.89	71.05	71.05		100	78.85	61.54	50	23.08
100	72.12	62.02	49.04	34.62		100	71.05	63.16	31.58	15.79
100	82.98	63.83	57.45	44.68		100	80	46.67	40	20
100	82.35	64.71	61.76	61.76		100	40.54	8.11	0	0
Figure 7, figure supplement 1B, paramecia consumption NTR+ animals
MTZ [%]						DMSO, [%]
min 1	min 5	min 10	min 15	min 20		min 1	min 5	min 10	min 15	min 20
100	94.4	94.4	88.9	88.9		100	102.8	100	94.4	100
100	94.7	94.7	94.7	89.5		100	103.6	96.4	96.4	78.6
100	97.7	95.5	90.9	100		100	94.4	100	105.6	94.4
100	106.9	100	103.4	75.9		100	92.3	80.8	57.7	53.8
100	98.1	100	88.9	81.5		100	75.9	44.8	31	17.2
100	98.6	100	91.4	82.9		100	85	55	45	20
100	100	90.9	90.9	90.9		100	81.7	80	73.3	66.7
100	82.3	90.3	77.4	64.5		100	78.1	62.5	43.8	21.9
100	91.3	90	72.5	67.5		100	91.9	86	65.1	51.2
100	83.3	71.8	61.5	43.6		100	100	87.1	74.2	67.7
100	105.7	100	97.1	80
Figure7, figure supplement 1D, number of paramecia at start					Figure7, figure supplement1 E and F, mean swim speed per fish
NTR+		NTR-			acclimation period [mm/s]			prey capture period [mm/s]
MTZ	DMSO	MTZ	DMSO		NTR+			NTR+
18	18	31	38		MTZ	DMSO		MTZ	DMSO
19	28	41.7	54		0.036	0.1112		0.0327	0.2045
22	18	43.3	25		0.0163	0.0156		0.0318	0.3081
29	26	44	27.7		0.0395	0.0965		0.594	0.9865
27	29	33	23.7		0.1034	0.2806		0.2553	1.008
35	20	45.3	41		0.01	0.4806		0.4336	0.6283
22	30	24	21		0.0176	0.0904		0.4885	0.6708
31	32	28.3	26		0.3843	0.0575		0.704	0.5494
40	43	29.5	27.5		0.3918	0.2606		1.2212	1.0299
39	31	43	33		0.2706	0.1023		0.8955	1.0984
35		31	35		0.0368	0.4143		0.7358	1.6065
		24	30		0.239	NaN		1.2955	NaN
		36	36
		24	33
		25.3	26
		34.7	12.7
		15.7	15
		34	12.3
