# Supplementary material for: Experience, circuit dynamics, and forebrain recruitment in larval zebrafish prey capture
Source: eLife. 2020 Sep 28;9:e56619. doi: 10.7554/eLife.56619 (PMC7561350; doi:10.7554/eLife.56619)
Supplement: Figure 7—figure supplement 2—source data 1. [file elife-56619-fig7-figsupp2-data1.csv]

Source data Figure 7, figure supplement 2
Figure 7, figure supplement 2 B
Expression volume, vs total fluorescent intensity
NTR+
with metronidazole (+MTZ)		without metronidazole (-MTZ)
expression volume [um3]	total fluorescent intensity [a.u.]	expression volume [um3]	total fluorescent intensity [a.u.]
1503.48	47697.19	177655.38	286858.81
21777.43	134077.41	91953.50	132797.93
14564.35	109995.05	73571.90	117949.17
21530.38	114703.77	125216.67	161023.32
26591.87	130839.10	57825.27	131432.72
15462.55	295242.49	48423.63	125850.46
12836.27	84184.43	26277.04	105218.88
3104.84	310427.49	160048.87	58094.66
31367.53	138239.25	2471.23	68394.80
13543.88	102227.95	8607.90	117800.97
