# Supplementary material for: Experience, circuit dynamics, and forebrain recruitment in larval zebrafish prey capture
Source: eLife. 2020 Sep 28;9:e56619. doi: 10.7554/eLife.56619 (PMC7561350; doi:10.7554/eLife.56619)
Supplement: Figure 7—source data 1. [file elife-56619-fig7-data1.csv]

Figure 7
Figure 7 C, expression volume [um3]
metronidazole	DMSO
1503.5	177655.4
21777.4	91953.5
14564.4	73571.9
21530.4	125216.7
26591.9	57825.3
15462.6	48423.6
12836.3	26277
3104.8	160048.9
31367.5	2471.2
13543.9	8607.9
Figure 7D, cumulative convergence number NTR- fish
MTZ	minutes
fish #	1	2	3	4	5	6	7	8	9	10	11	12	13	14	15	16	17	18	19	20
7	2	7	12	17	20	23	29	33	37	40	43	47	50	53	58	62	63	68	73	75
8	5	7	10	15	19	22	24	26	29	32	33	39	42	46	47	49	50	53	58	60
14	2	6	9	9	10	10	13	14	16	16	19	21	22	25	28	31	34	37	42	46
15	2	4	4	7	9	13	16	19	22	24	26	29	33	37	43	45	45	49	53	55
16	2	3	4	7	7	8	12	15	15	15	18	24	27	28	29	33	33	34	38	40
23	1	3	6	10	12	14	15	18	21	23	27	31	33	35	39	42	42	46	48	49
24	3	5	6	10	12	15	16	16	18	18	20	21	22	23	24	26	26	26	26	28
53	4	7	10	14	16	21	25	28	32	33	33	35	37	41	44	47	47	49	53	57
55	3	9	11	15	20	24	27	28	31	36	39	40	42	45	47	50	51	52	53	56
56	6	11	16	21	26	31	37	40	43	45	50	55	61	64	66	72	75	79	83	87
62	3	7	9	11	13	16	19	21	23	25	28	30	36	37	40	41	42	43	44	46
64	0	2	2	2	3	3	3	3	4	5	7	7	7	7	7	7	7	7	7	7
69	1	4	6	7	10	12	14	15	19	20	22	24	28	29	31	34	34	35	38	38
70	1	2	5	8	10	12	16	18	20	22	25	27	28	30	31	34	35	37	38	38
71	0	2	6	8	10	14	18	20	25	27	30	32	34	36	37	39	41	44	46	47
72	3	7	11	14	17	20	23	25	27	29	30	33	35	37	41	44	46	48	51	54
DMSO	minutes
fish #	1	2	3	4	5	6	7	8	9	10	11	12	13	14	15	16	17	18	19	20
31	2	3	5	6	7	8	9	12	14	16	17	18	19	21	22	26	27	30	34	36
32	0	0	0	2	4	5	6	7	7	8	10	15	17	18	21	23	26	28	30	30
38	0	0	0	0	0	0	0	0	3	6	11	11	11	11	11	14	14	14	14	14
39	2	3	4	7	9	12	14	17	20	23	25	27	29	30	32	34	35	38	40	43
40	5	9	15	20	25	29	31	36	38	40	43	47	52	54	57	61	62	65	66	69
46	3	9	14	17	21	25	28	32	34	35	36	38	40	45	49	54	56	59	61	65
47	1	2	2	2	4	6	7	8	10	11	12	14	16	18	18	19	19	21	23	23
48	1	1	3	4	5	6	7	8	8	8	8	9	10	10	10	11	11	13	14	14
79	2	3	3	4	7	10	12	17	19	22	26	29	32	33	36	38	39	41	45	46
80	2	5	10	12	16	20	24	26	32	34	37	42	46	48	50	53	55	58	60	64
85	4	7	9	12	14	16	18	20	23	24	26	26	29	30	31	32	32	33	33	33
86	1	1	3	5	7	9	10	11	13	15	18	18	20	22	23	24	24	27	27	27
87	3	7	10	15	18	22	25	28	31	35	39	41	45	48	50	55	58	61	62	63
88	2	5	9	12	17	22	25	28	31	34	35	38	42	45	50	53	53	56	59	61
92	1	2	4	7	10	12	14	17	18	20	22	24	26	28	32	34	35	36	38	40
94	2	3	3	3	4	6	10	12	16	16	17	20	21	23	25	29	29	30	32	33
95	3	5	7	9	14	16	17	21	23	25	27	27	29	31	32	34	34	36	39	40
Figure 7E, cumulative convergence number average NTR+ fish
MTZ	minutes
fish #	1	2	3	4	5	6	7	8	9	10	11	12	13	14	15	16	17	18	19	20
4	0	0	0	0	0	0	0	0	2	2	2	2	2	2	3	4	4	4	4	5
5	1	1	1	3	4	4	6	6	7	9	9	9	9	10	13	13	14	14	15	15
12	0	3	5	6	7	7	8	10	12	13	15	16	18	20	22	25	29	31	33	34
13	0	0	0	0	0	0	0	3	4	5	6	6	7	7	8	9	9	9	10	11
20	0	0	0	0	0	1	1	2	2	2	2	3	4	4	4	4	4	4	4	6
21	0	0	3	4	5	7	8	9	10	11	12	12	12	13	13	14	16	17	19	21
51	3	5	7	9	12	15	18	20	23	25	27	29	33	36	39	42	43	46	50	52
52	4	8	11	12	16	20	23	28	33	41	44	47	49	55	60	62	64	68	71	74
66	2	2	2	3	3	3	3	5	7	12	13	15	15	16	16	17	17	18	19	21
67	3	8	9	12	16	19	21	25	28	31	32	32	34	36	38	40	40	41	44	45
68	1	4	5	7	8	12	12	15	17	18	20	23	26	29	33	35	38	44	47	50
MTZ	minutes
fish #	1	2	3	4	5	6	7	8	9	10	11	12	13	14	15	16	17	18	19	20
28	1	2	2	3	3	5	6	8	10	10	13	14	15	16	16	17	19	19	20	21
29	1	2	3	3	4	7	8	9	11	12	12	12	13	15	18	18	19	20	21	23
36	0	1	1	1	4	4	4	5	5	7	10	11	15	16	17	18	19	21	24	26
37	1	3	6	9	11	13	17	20	22	25	27	31	33	38	40	42	46	49	53	56
44	4	7	11	15	18	23	27	31	34	39	44	46	46	47	48	49	50	51	53	53
45	0	2	8	10	11	16	18	22	27	33	36	38	42	45	46	48	51	53	55	57
75	0	0	3	5	6	10	13	15	17	22	24	26	28	31	34	37	40	43	46	48
76	2	5	8	12	17	20	22	26	32	36	41	44	47	48	50	54	59	61	66	70
84	5	8	10	12	17	18	20	22	23	26	30	33	36	40	42	45	45	47	48	50
91	3	10	13	17	21	24	26	27	29	33	37	43	46	50	54	57	62	62	62	62
Figure 7F, percent difference
MTZ	DMSO
0.033	0.189
0.164	0.185
0.147	0.209
0.053	0.283
0.073	0.208
0.082	0.224
0.228	0.246
0.254	0.27
0.06	0.244
0.173	0.226
0.227
