# Supplementary figures and images for: Experience, circuit dynamics, and forebrain recruitment in larval zebrafish prey capture
Source: eLife journal article supplement (doi:10.7554/elife.56619), 2020-09-28

A

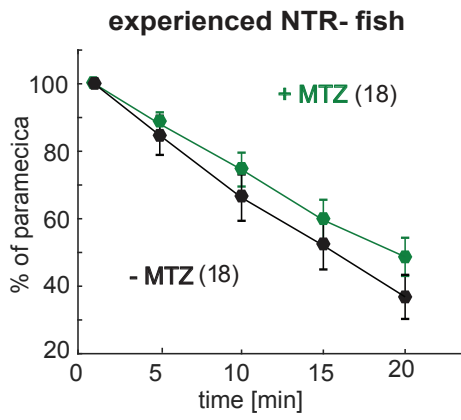

B

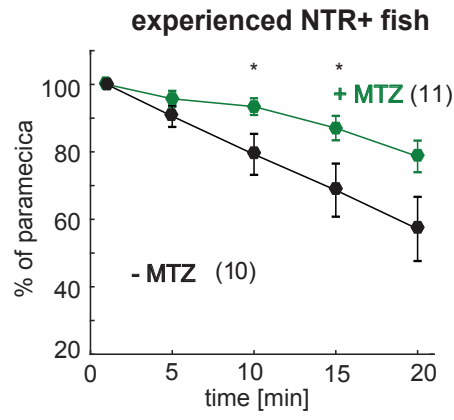

C

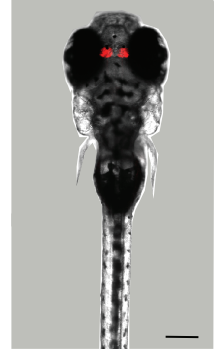

D

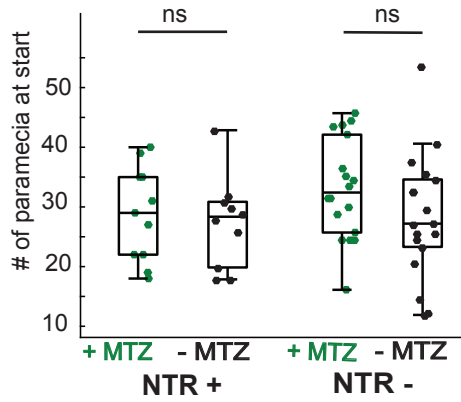

E

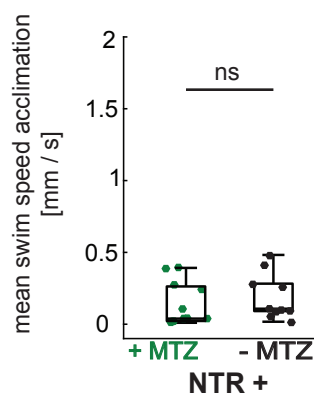

F

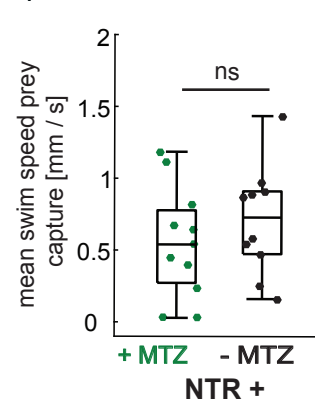

G

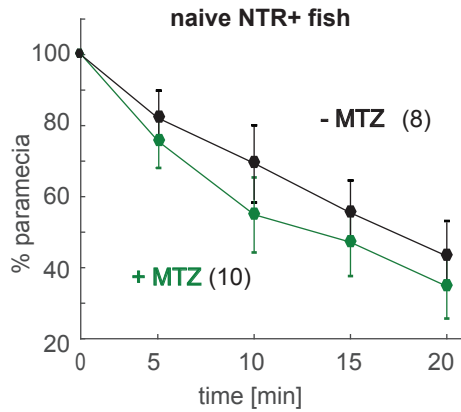

Supplement: supp [file elife-56619-supp-v1.zip]

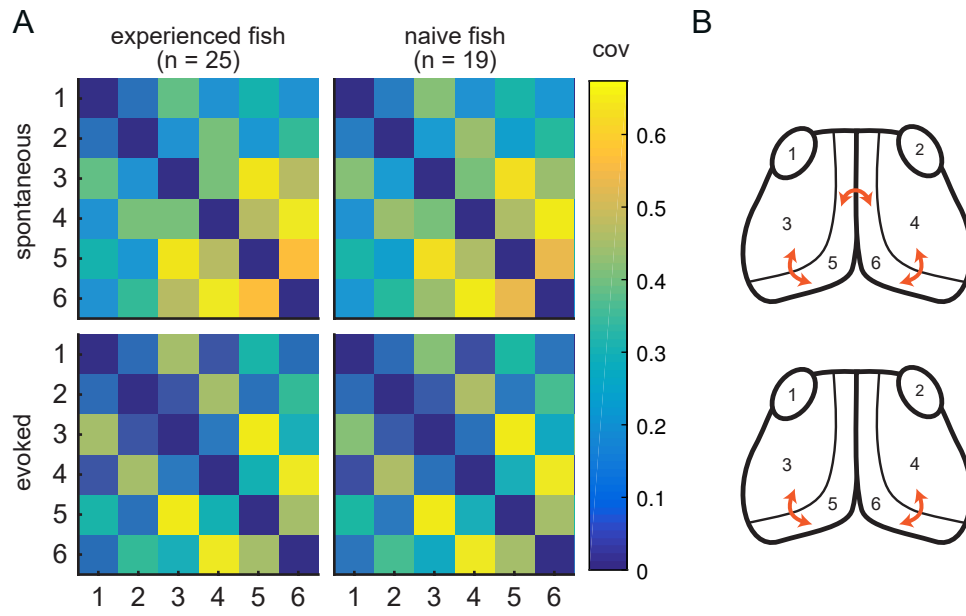

Supplement: supp [file elife-56619-supp-v1.zip]

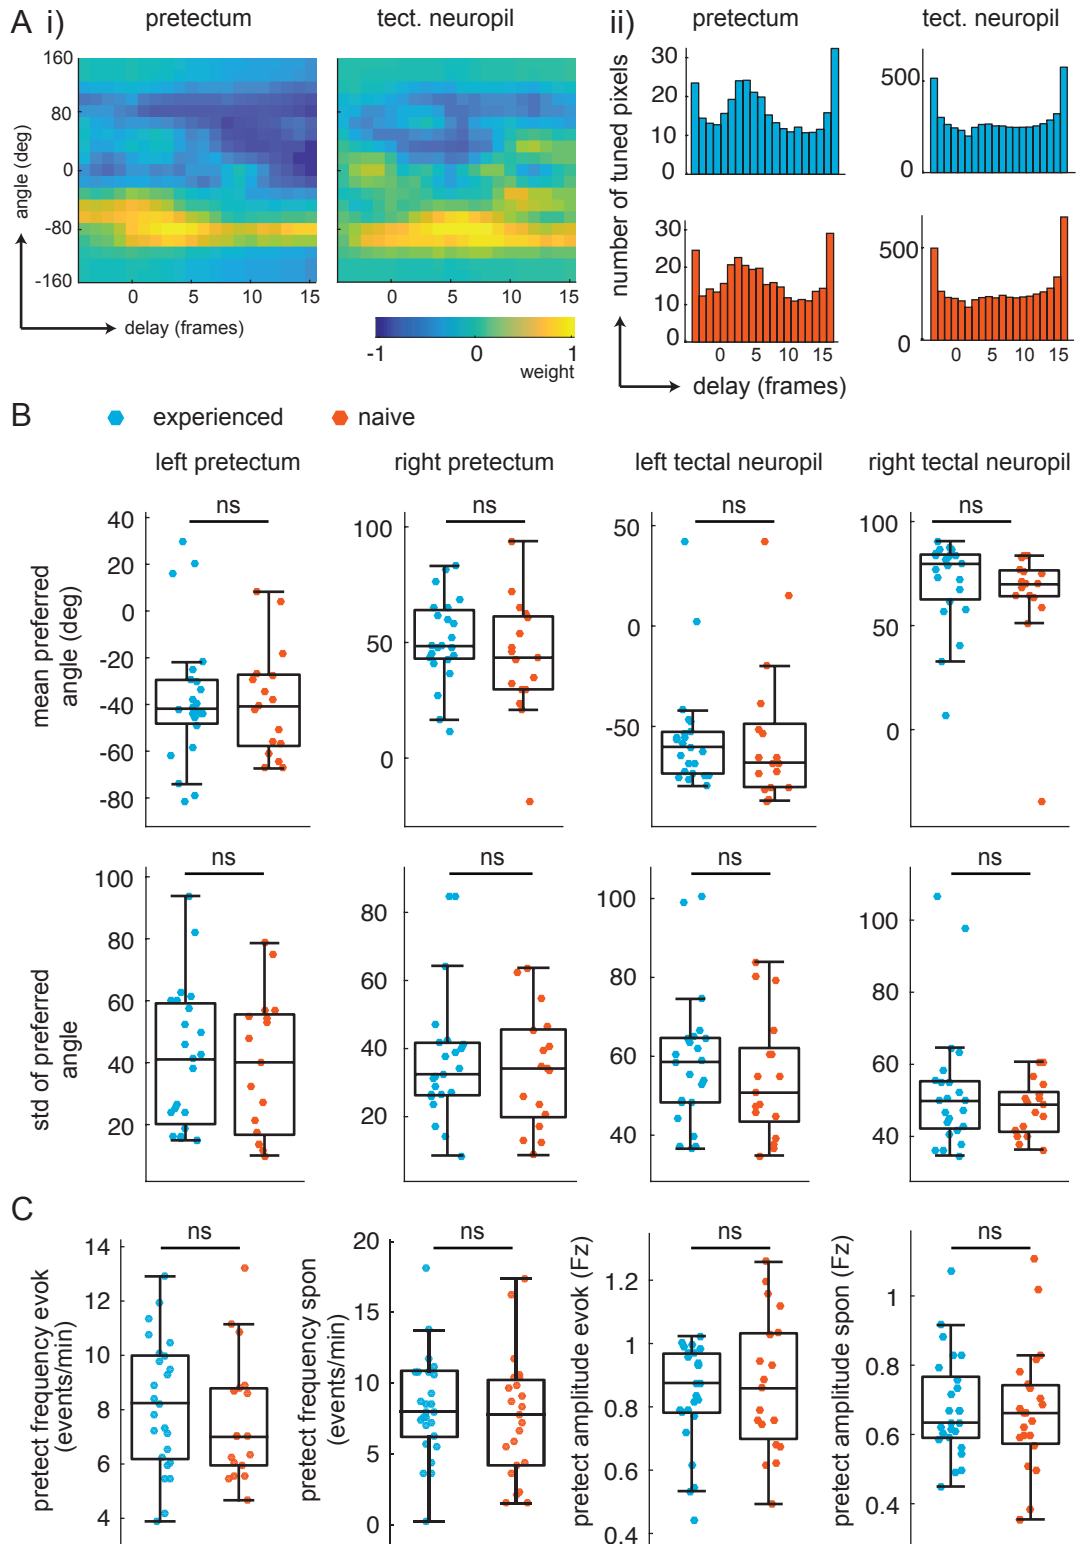

Supplement: supp [file elife-56619-supp-v1.zip]

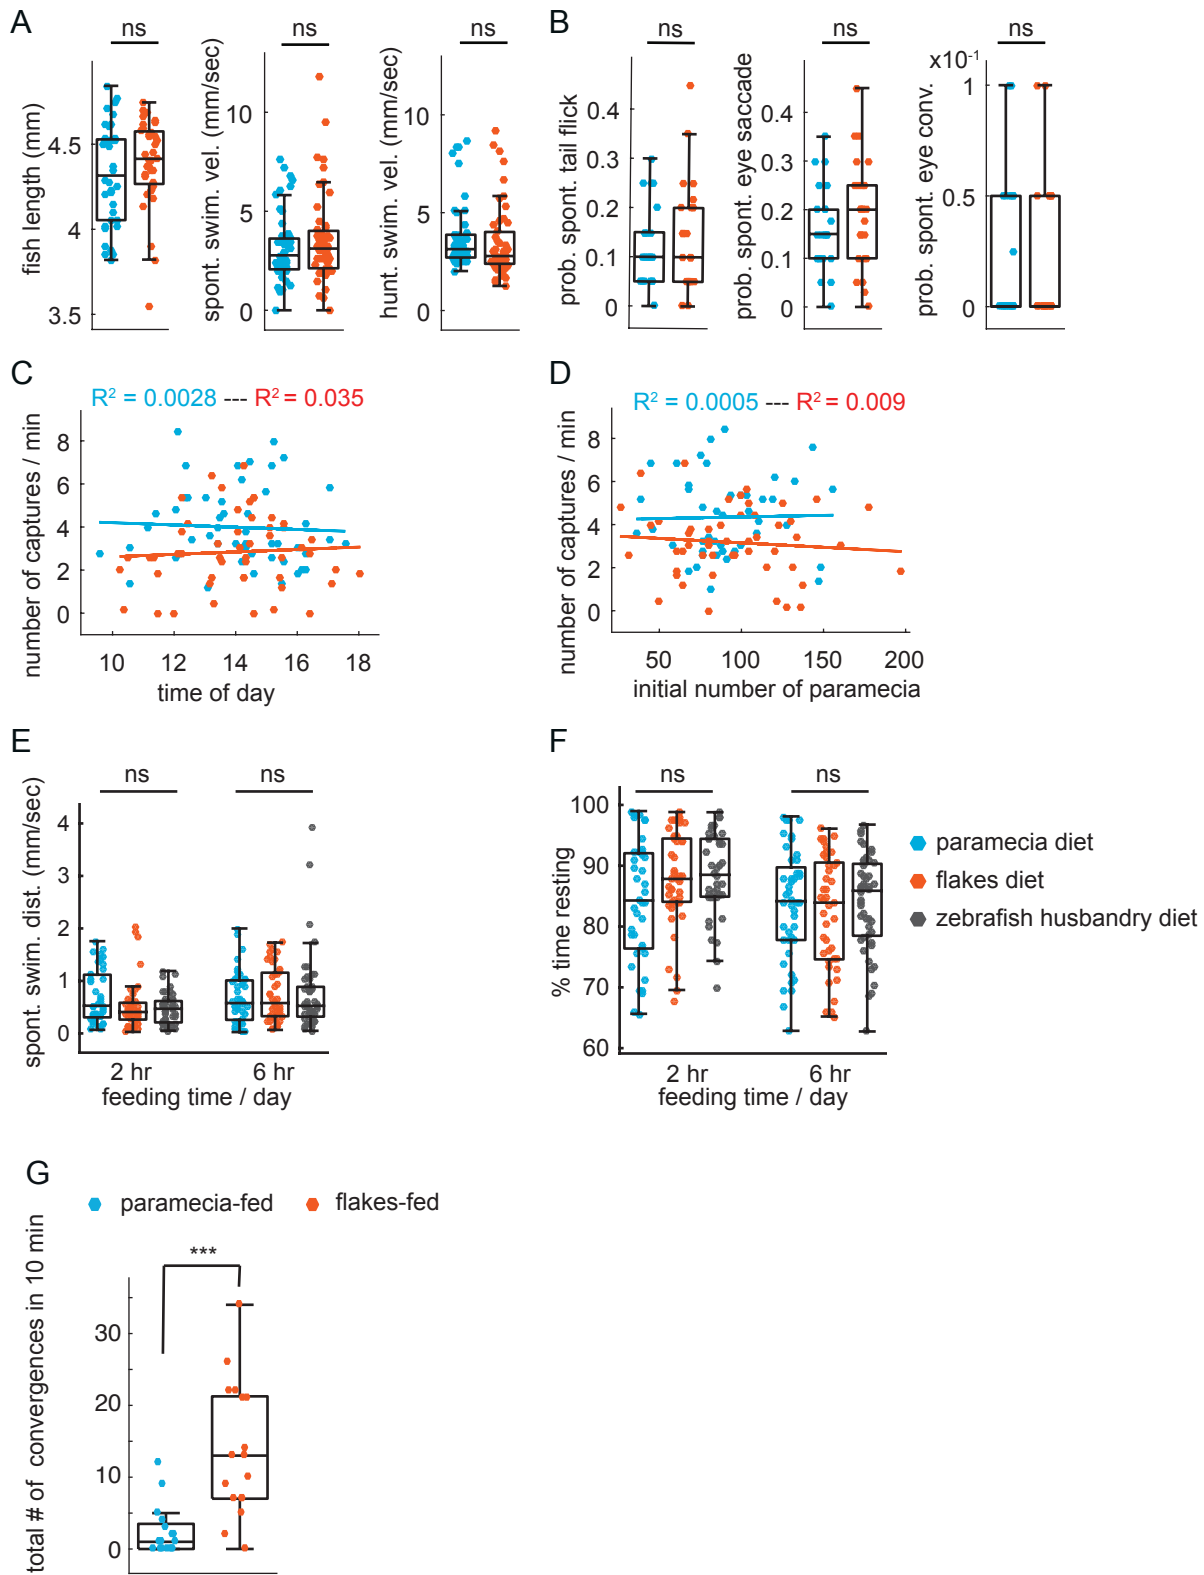

Supplement: supp [file elife-56619-supp-v1.zip]

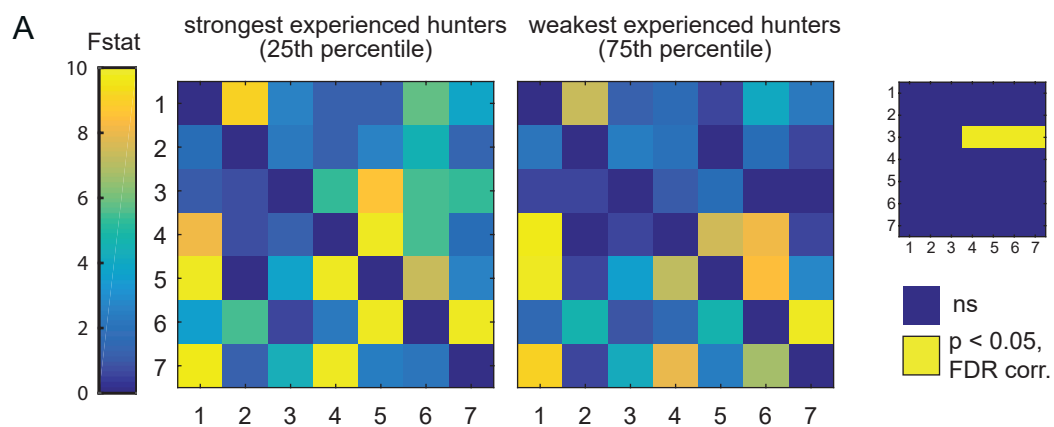

Supplement: supp [file elife-56619-supp-v1.zip]

A

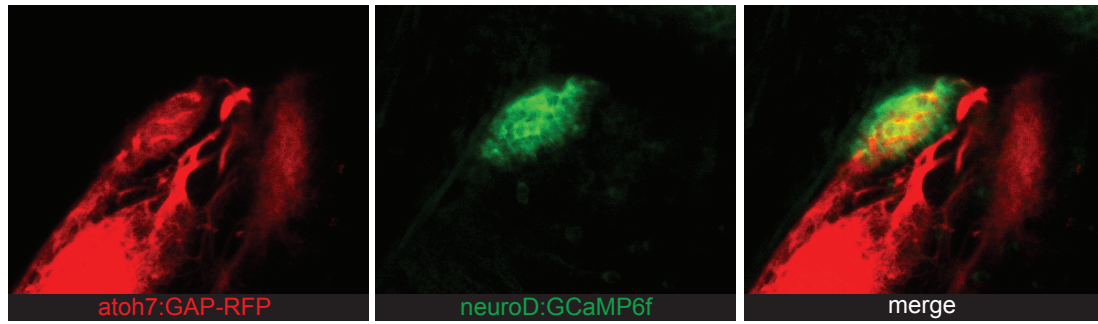

B

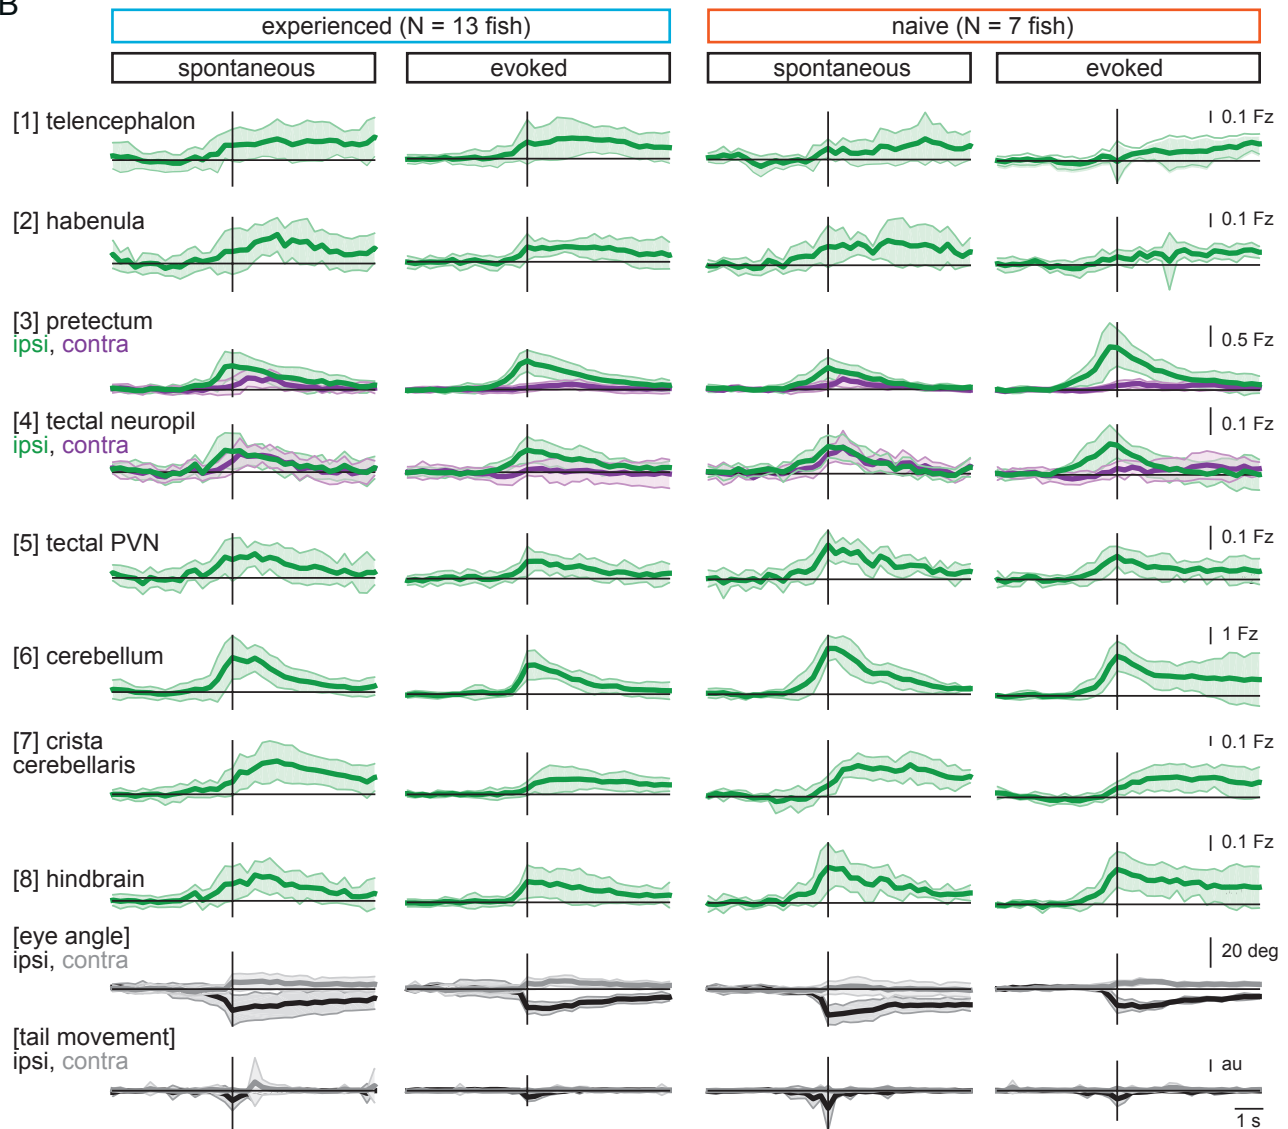

C

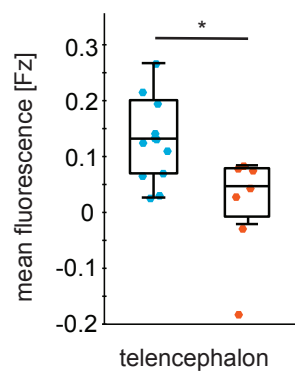

D

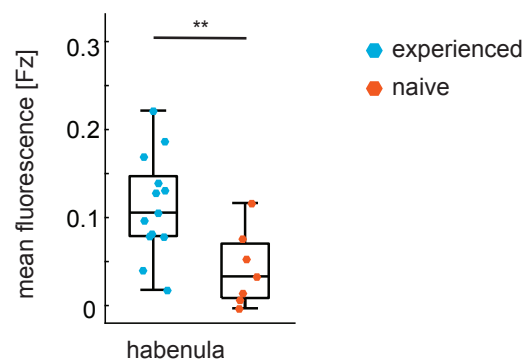

Supplement: supp [file elife-56619-supp-v1.zip]

A

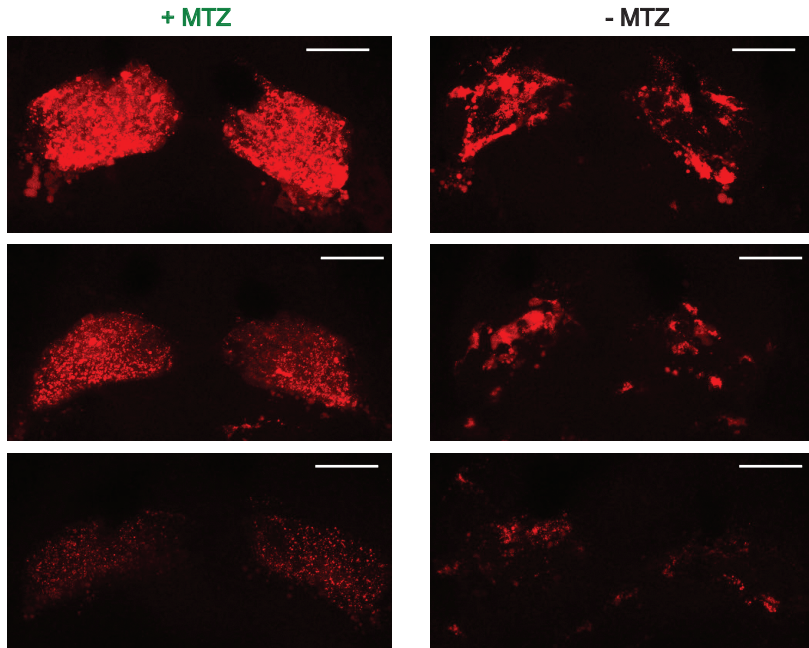

B

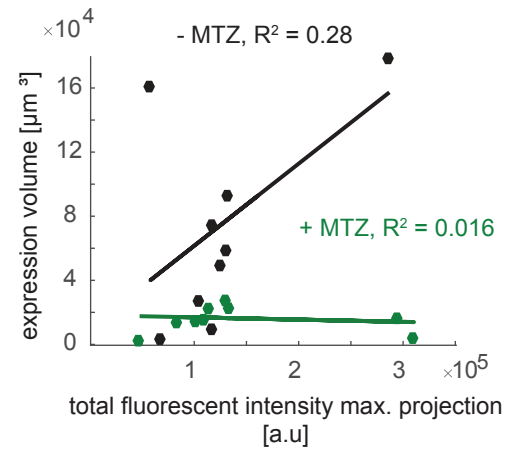

Supplement: supp [file elife-56619-supp-v1.zip]
